# Supplementary material for: Intramolecular C(sp2)–C (sp2) bond formation between phenanthroline and β-diketone thiosemicarbazones in PtII complexes: crystal structures and computational studies
Source: Royal Society of Chemistry journal article supplement (doi:10.1039/d0dt00367k), 2020-01-01
Supplement: d0dt00367k1.pdf [file d0dt00367k1.pdf]

## Supplementary Material

### Intramolecular C(sp<sup>2</sup>)-C(sp<sup>2</sup>) bond formation between phenanthroline and β-Diketone Thiosemicarbazones in Pt<sup>II</sup> complexes: Crystal Structures and Computational Studies

Ana C. R. Gonçalves,<sup>†</sup> Andressa R. Rettondin,<sup>†</sup> Carolina G. Oliveira,<sup>‡</sup> Antonio O. T. Patrocínio,<sup>‡</sup> Antônio E. H. Machado,<sup>‡,‡</sup> Victor M. Deflon,<sup>§</sup> Ulrich Abram<sup>&</sup> and Pedro I. S. Maia<sup>†,\*</sup>

<sup>†</sup> Núcleo de Desenvolvimento de Compostos Bioativos (NDCBio), Universidade Federal do Triângulo Mineiro, 38025-440, Uberaba – MG, Brazil

<sup>‡</sup> Instituto de Química, Universidade Federal de Uberlândia, Av. João Naves de Ávila 2121, 38408-100, Uberlândia-MG, Brazil,

<sup>‡</sup>Programa de Pós-Graduação em Ciências Exatas e Tecnológicas, Universidade Federal de Catalão, Av. Dr. Lamartine Pinto de Avelar, 1120, 75704-020 Catalão-GO, Brazil

<sup>§</sup> Instituto de Química de São Carlos, Universidade de São Paulo, Av. Trabalhador São Carlense, 400, 13566-590, São Carlos – SP, Brazil,

<sup>&</sup> Freie Universität Berlin, Institute of Chemistry and Biochemistry, Fabeckstr. 34-36, D-14195 Berlin, Germany.

## Contents

|                                                                                                          |    |
|----------------------------------------------------------------------------------------------------------|----|
| 1.1 Materials and instruments. ....                                                                      | 1  |
| 1.2 Synthesis of the Complexes. ....                                                                     | 1  |
| 1.2.1 Complexes of the type [Pt(phenL <sup>R</sup> )]. ....                                              | 1  |
| 1.2.2 Synthesis of the intermediate II <sup>Et</sup> .....                                               | 2  |
| 2 X-ray Crystallography .....                                                                            | 3  |
| 3 DFT Calculations .....                                                                                 | 7  |
| 4 Scheme S1. Proposed reaction pathway for the formation of the complexes [Pt(phenL <sup>R</sup> )] .... | 9  |
| 5 FTIR data .....                                                                                        | 10 |
| 6. NMR data .....                                                                                        | 12 |
| 7 HRMS data .....                                                                                        | 15 |
| 8 HPLC data .....                                                                                        | 17 |
| 9. UV-vis data .....                                                                                     | 18 |
| 10. Supplementary References .....                                                                       | 20 |
| 11. Optimized parameters for the TS, Reagents and Products .....                                         | 21 |

## 1.1 Materials and instruments

Benzoylacetone, 4-phenyl-3-thiosemicarbazide, 4-ethyl-3-thiosemicarbazide, triethylamine, phenanthroline and potassium tetrachloroplatinate(II) (Sigma-Aldrich) and solvents were reagent grade and used without further purification.  $[\text{PtCl}_2(\text{phen})]$  and  $\text{H}_2\text{L}^{\text{R}}$  have been prepared as previously reported.<sup>1, 2</sup> The melting points were determined using a PF1500 FARMA-GEHAKA instrument. Elemental analyses (CHNS) were determined using a Perkin Elmer CHNS/O 2400 Series II equipment. FTIR spectra were measured as KBr pellets on a Shimadzu IR Prestige-21 spectrophotometer between 400 and 4000  $\text{cm}^{-1}$ , with resolution of 4  $\text{cm}^{-1}$ , on Bruker Alpha IR (PLATINUM-ATR). The  $^1\text{H}$  NMR spectra were acquired using an Agilent 400/54 Premium Shielded 9.4 T spectrometer, operating at 399.8 MHz. The  $^1\text{H}$  NMR spectra were internally referenced to TMS. The  $^{195}\text{Pt}$  NMR spectra were acquired using a Bruker Avance III 600 MHz equipped with BBO probe with Z gradients spectrometer, operating at 128.98 MHz. The  $^{195}\text{Pt}$  NMR spectra were internally referenced with  $\text{K}_2\text{PtCl}_4$ . Electrospray ionization mass spectrometry (ESI-MS) spectra were recorded on an Agilent 6130B single quadrupole detector instrument at 298 K with a scan range of  $m/z$  50–2000 for positive ions. Samples were prepared in methanol or acetonitrile solutions. All chromatograms were obtained using an Agilent 1100 system with a DAD and a 100  $\mu\text{L}$  loop. The HPLC column was an Agilent ZORBAX Eclipse Plus C18 250  $\times$  4.6 mm column with a pore size of 5  $\mu\text{m}$ . Mobile phases consisted of doubly deionized water 0.1% TFA and HPLC grade acetonitrile 0.1% TFA. Unfiltered volumes of <200  $\mu\text{L}$  were injected and analyzed at a detection wavelength of 254 nm. HPLC chromatograms were analyzed and integrated using DataAnalysis software. The following solvent gradient and 1 mL min<sup>-1</sup> flow rate was used: time (min)/% (B): 0 (min)/10%, 30 (min)/80%, 40 (min)/80%, 41 (min)/10%, 55 (min)/10%.

## 1.2 Synthesis of the complexes

**1.2.1 Complexes of the type  $[\text{Pt}(\text{phenL}^{\text{R}})]$  ( $R = \text{Et}$  or  $\text{Ph}$ ).**  $\text{H}_2\text{L}^{\text{R}}$  (0.1 mmol) was added to a suspension of  $[\text{PtCl}_2(\text{phen})]$  (0.1 mmol) in MeCN (5 mL). After 10 min of stirring, approximately 0.3 mL of  $\text{Et}_3\text{N}$  were added. The mixtures were then kept under reflux for 8 hours. The dark red mixtures were kept in a refrigerator for 1 day in order to precipitate red solids which were filtered off, washed with a small

portion of *n*-hexane and dried under vacuum. Recrystallization from MeOH/CH<sub>2</sub>Cl<sub>2</sub> (1:2) afforded single-crystals suitable for X-ray diffraction.

[Pt(phenL<sup>Et</sup>)]: Yield (27 mg, 43 %). mp: 250–252 °C (from MeOH). Anal. calcd. for C<sub>25</sub>H<sub>21</sub>N<sub>5</sub>OPtS: C, 47.3; H, 3.3; N, 11.0; S, 5.1%. Found: C, 46.5; H, 3.4; N, 10.7; S, 5.1 %. IR (Selected bands,  $\nu_{\max}/\text{cm}^{-1}$ ): 3428 (NH), 1637 (C=O), 1564 (C=N), 1541 (C=C + C–C), 827 (CS). UV-Vis bands ( $\lambda_{\max}$ ) from CH<sub>2</sub>Cl<sub>2</sub> solution [nm (log  $\epsilon$ ): 268 (3.74), 509 (3.02). <sup>1</sup>H NMR (400 MHz; CDCl<sub>3</sub>; Me<sub>4</sub>Si): 1.31 (t, *J* = 8 Hz, 3H, –CH<sub>2</sub>CH<sub>3</sub>), 2.46 (s, 3H, CH<sub>3</sub>), 3.51 (q, *J* = 8 Hz, 2H, –CH<sub>2</sub>CH<sub>3</sub>), 4.67 (s, 1H, NH), 7.40–9.55 (m, 12H, Arom.). <sup>1</sup>H NMR (400 MHz; CD<sub>2</sub>Cl<sub>2</sub>): 1.29 (t, *J* = 8 Hz, 3H, –CH<sub>2</sub>CH<sub>3</sub>), 2.38 (s, 3H, CH<sub>3</sub>), 3.47 (q, *J* = 8 Hz, 2H, –CH<sub>2</sub>CH<sub>3</sub>), 4.66 (s, 1H, NH), 7.39–9.26 (m, 12H, Arom.). ESI<sup>+</sup> MS (*m/z*, assignment): 634.1114 ([M+H]<sup>+</sup>, 100%), calcd: 634.1109. HPLC (retention time): 26.8 min.

[Pt(phenL<sup>Ph</sup>)]: Yield (41 mg, 61 %). mp: 185–187 °C (from MeOH). Anal. calcd for C<sub>29</sub>H<sub>21</sub>N<sub>5</sub>OPtS: C, 51.0; H, 3.1; N, 10.3; S, 4.7 %. Found: C, 49.9; H, 3.4; N, 10.2; S, 4.8 %. IR (Selected bands,  $\nu_{\max}/\text{cm}^{-1}$ ): 3384 (NH), 1655 (C=O), 1599 (C=N), 1551, 1556 (C=C + C–C), 820 (CS). UV-Vis bands ( $\lambda_{\max}$ ) from CH<sub>2</sub>Cl<sub>2</sub> solution [nm (log  $\epsilon$ ): 250 (3.48), 506 (2.76). <sup>1</sup>H NMR (400 MHz, CDCl<sub>3</sub>; Me<sub>4</sub>Si): 2.50 (s, 3H, CH<sub>3</sub>), 5.74 (s, 1H, NH), 6.60–8.37 (m, 17H, Ph). ESI<sup>+</sup> MS (*m/z*, assignment): 682.1111 ([M+H]<sup>+</sup>, 100%), calcd: 682.1109.

**1.2.2 Synthesis of the intermediate **11**<sup>Et</sup>.** The intermediate **11**<sup>Et</sup> was prepared by a similar procedure to that of the complex [Pt(phenL<sup>Et</sup>)] (**1**). H<sub>2</sub>L<sup>Et</sup> (0.1 mmol) was added to a suspension of [PtCl<sub>2</sub>(phen)] (0.1 mmol) in HPLC grade MeCN (3 mL). After 10 min of stirring, 0.1 mL of Et<sub>3</sub>N was added. The mixture was then kept under reflux for 2 hours. After cooling to room temperature, the yellow precipitate formed was filtered off washed with a small portion of *n*-hexane and dried under vacuum.

[Pt(phen)(HL<sup>Et</sup>)] (**11**<sup>Et</sup>): Color: yellow. Yield (35 mg, 55.0%). Anal. calcd for C<sub>25</sub>H<sub>24</sub>N<sub>5</sub>OPtS: C, 47.1; H, 3.8; N, 11.0; S, 5.0. Found: C, 46.7; H, 3.5; N, 10.6; S, 5.2 %. IR (Selected bands,  $\nu_{\max}/\text{cm}^{-1}$ ): 3329 (NH), 1585 (C=N), 1543, 1502 (C=C + C–C), 820 (CS). UV-Vis bands ( $\lambda_{\max}$ ) from CH<sub>2</sub>Cl<sub>2</sub> solution [nm (log  $\epsilon$ ): 270 nm (3.37), 402 nm (2.89). <sup>1</sup>H NMR (400 MHz; CD<sub>2</sub>Cl<sub>2</sub>): 1.20 (t, *J* = 8 Hz, 3H,

–CH<sub>2</sub>CH<sub>3</sub>), 2.34 (s, 3H, CH<sub>3</sub>), 3.36 (q, J = 8 Hz, 2H, –CH<sub>2</sub>CH<sub>3</sub>), 4.52 (s, 1H, NH), 5.64 (s, 1H, CH), 7.04 (t, J = 7.6 Hz, 2H, Ph), 7.12-7.17 (m, 3H, Ph), 7.64 (d, J = 4.6 Hz, 1H, Phen), 7.66 (d, J = 4.6 Hz, 1H, Phen), 7.92 (s, 2H, Phen), 8.38 (d, J = 6.0 Hz, 2H, Phen), 9.53 (s, 1H, Phen). ESI<sup>+</sup> MS (m/z, assignment): 637.1345 ([M+H]<sup>+</sup>, 100%), calcd: 637.1349. HPLC (retention time): 21.5 min

### ***1.3 X-ray Crystallography***

The data collection was performed at room temperature (296 K) using Mo-K $\alpha$  radiation ( $\lambda = 0.71073 \text{ \AA}$ ) on a BRUKER APEX II Duo diffractometer. Standard procedures were applied for data reduction and absorption correction. The structure was solved with SHELXS97 using direct methods and refined by full-matrix least-square methods against F<sup>2</sup> (SHELXL2014).<sup>3</sup> All non-hydrogen atoms were refined with anisotropic displacement parameters with SHELXL2014.<sup>3</sup> The hydrogen atoms were calculated at idealized positions using the riding model option of SHELXL2014.<sup>3</sup> More details on data collections and structure refinement are reported in Table S1. Selected bond lengths and angles are given in Tables S2.

**Table S1** - X-ray Structure Data Collection and Refinement Parameters for **1** and **2**.

|                                                             | <b>1</b>                                                                                        | <b>2</b>                                                                                          |
|-------------------------------------------------------------|-------------------------------------------------------------------------------------------------|---------------------------------------------------------------------------------------------------|
| Formula                                                     | C <sub>25</sub> H <sub>21</sub> N <sub>5</sub> OPtS                                             | C <sub>29</sub> H <sub>21</sub> N <sub>5</sub> OPtS                                               |
| Fw                                                          | 634.62                                                                                          | 682.66                                                                                            |
| Crystalline system                                          | Monoclinic                                                                                      | Triclinic                                                                                         |
| Space Group                                                 | <i>P</i> 2 <sub>1</sub> / <i>c</i>                                                              | <i>P</i> $\bar{1}$                                                                                |
| <i>a</i> (Å)                                                | 7.3572(3)                                                                                       | 12.7380(4)                                                                                        |
| <i>b</i> (Å)                                                | 12.3495(5)                                                                                      | 14.3284(5)                                                                                        |
| <i>c</i> (Å)                                                | 24.1793(9)                                                                                      | 14.5859(5)                                                                                        |
| $\alpha$ (°)                                                | 90                                                                                              | 69.471(2)                                                                                         |
| $\beta$ (°)                                                 | 92.552(2)                                                                                       | 85.039(2)                                                                                         |
| $\gamma$ (°)                                                | 90                                                                                              | 77.604(2)                                                                                         |
| <i>V</i> (Å <sup>3</sup> )                                  | 2194.70(15)                                                                                     | 2434.79(15)                                                                                       |
| <i>Z</i>                                                    | 4                                                                                               | 4                                                                                                 |
| $\mu$ (mm <sup>-1</sup> )                                   | 6.518                                                                                           | 5.883                                                                                             |
| Crystal size                                                | 0.430 x 0.190 x 0.100                                                                           | 0.260 x 0.100 x 0.070                                                                             |
| $\theta$ range for data collection (°)                      | 2.359 to 25.112                                                                                 | 1.491 to 25.038                                                                                   |
| Index range                                                 | -8 $\leq$ <i>h</i> $\leq$ 8,<br>-14 $\leq$ <i>k</i> $\leq$ 14,<br>-28 $\leq$ <i>l</i> $\leq$ 28 | -15 $\leq$ <i>h</i> $\leq$ 15,<br>-17 $\leq$ <i>k</i> $\leq$ 17,<br>-17 $\leq$ <i>l</i> $\leq$ 17 |
| reflections collected                                       | 13553                                                                                           | 28508                                                                                             |
| reflections unique / <i>R</i> <sub>int</sub>                | 3890 / 0.0355                                                                                   | 8551 / 0.0321                                                                                     |
| data/restraints/param.                                      | 3890 / 0 / 300                                                                                  | 8551 / 1 / 663                                                                                    |
| absorption correction                                       | Multi-scan                                                                                      | Multi-scan                                                                                        |
| max/min transmission                                        | 0.5618 and 0.1660                                                                               | 0.7452 / 0.6661                                                                                   |
| Final <i>R</i> indices [ <i>I</i> >2 $\sigma$ ( <i>I</i> )] | <i>R</i> <sub>1</sub> = 0.0293, <i>wR</i> <sub>2</sub> = 0.0768                                 | <i>R</i> <sub>1</sub> = 0.0296, <i>wR</i> <sub>2</sub> = 0.0553                                   |
| <i>R</i> indices (all data)                                 | <i>R</i> <sub>1</sub> = 0.0474, <i>wR</i> <sub>2</sub> = 0.0899                                 | <i>R</i> <sub>1</sub> = 0.0489, <i>wR</i> <sub>2</sub> = 0.0614                                   |
| GOF on <i>F</i> <sup>2</sup> , <i>S</i>                     | 1.019                                                                                           | 1.023                                                                                             |
| Largest diff. peak and hole (e.Å <sup>-3</sup> )            | 1.141 and -0.799                                                                                | 0.745 and -0.412                                                                                  |
| Deposit number                                              | CCDC-1979092                                                                                    | CCDC-1979093                                                                                      |

**Table S2** – Selected bond lengths (Å) and angles (°) in **1** and **2**.

|                                | <b>1</b>   | <b>2*</b>  |            |
|--------------------------------|------------|------------|------------|
| <b><i>Bond lengths (Å)</i></b> |            |            |            |
| Pt-S(1)                        | 2.2593(14) | 2.2572(15) | 2.2536(15) |
| Pt-N(1)                        | 1.954(4)   | 1.964(3)   | 1.968(3)   |
| Pt-N(4)                        | 1.997(4)   | 1.989(4)   | 1.988(4)   |
| Pt-N(5)                        | 2.027(5)   | 2.016(4)   | 2.024(4)   |
| S(1)-C(1)                      | 1.752(5)   | 1.740(5)   | 1.743(5)   |
| O(1)-C(5)                      | 1.219(5)   | 1.222(6)   | 1.201(6)   |
| N(1)-C(2)                      | 1.333(7)   | 1.334(6)   | 1.349(6)   |
| <b><i>Bond Angles (°)</i></b>  |            |            |            |
| N(4)-Pt-S(1)                   | 179.42(11) | 178.89(11) | 178.59(12) |
| N(1)-Pt-N(5)                   | 175.14(15) | 175.85(18) | 175.90(17) |
| N(1)-Pt-N(4)                   | 93.62(17)  | 94.35(15)  | 94.25(16)  |
| S(1)-Pt-N(5)                   | 98.98(12)  | 98.97(14)  | 98.78(13)  |
| S(1)-Pt-N(1)                   | 85.83(13)  | 85.17(12)  | 85.24(13)  |
| N(5)-Pt-N(4)                   | 81.56(17)  | 81.51(17)  | 81.75(16)  |
| C(1)-S(1)-Pt                   | 94.51(18)  | 95.18(19)  | 95.15(19)  |
| C(4)-C(5)-O(1)                 | 120.7(5)   | 120.6(5)   | 120.8(5)   |

\* Values for two crystallographically independent molecules.

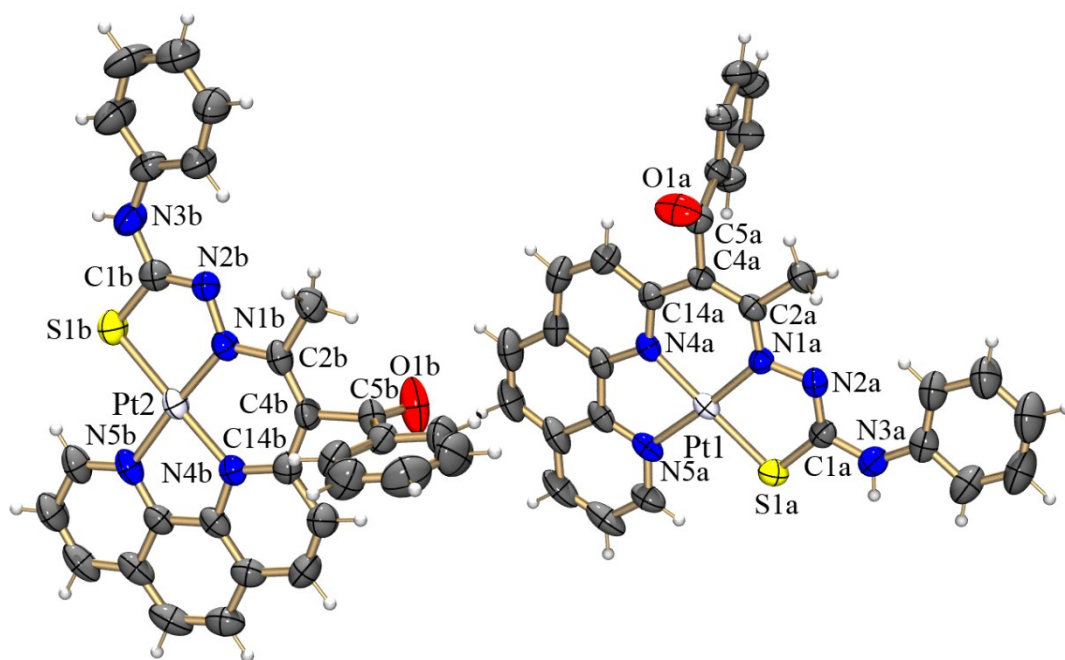

**Figure S1.** ORTEP view of [Pt(phenL<sup>Ph</sup>)] (**2**) with the thermal ellipsoids at the 50% probability level, including the atoms numbering scheme.

#### 1.4 DFT Calculations

Geometry optimization and analysis of the vibrational frequencies were performed for all structures, apart from the structure of the transition state, which was only done the analysis of the vibrational frequencies. The calculations were done using the Density Functional Theory hybrid functional m06 combined with TZP (Triple zeta valence quality plus polarization) atomic basis set.<sup>4-6</sup> In all calculations the compounds were considered solvated in acetonitrile, using the Polarizable Continuum Model IEFPCM<sup>7</sup> (see the parameters at the end of this document).

The “Transition State Search” was performed (software Gaussian 16, Revision A.03) using the *Synchronous Transit-guided Quasi-Newton* method<sup>8,9</sup> through the keyword QST3.

The vibrational spectra calculated for these compounds, did not present imaginary frequencies (except in the case of the transition state that presented only one of such frequencies) indicating that the stationary point found in the optimizations corresponds to the global minima of energy, apart from the structure of the transition state, for not being a global minimum structure. From the analysis of the vibrational frequencies, it was possible to estimate the thermal correction to Gibbs free energy ( $G_T$ ) of all species (**Table S3**), including the transition state.

In order to test the reliability of the transition state, a scan analysis was done from this state until the formation of the product, considering the relaxation of the resulting structures in each stage.

Except the “Transition State Search” all calculations were performed using the software Gaussian G09 revision E.01.<sup>10</sup>



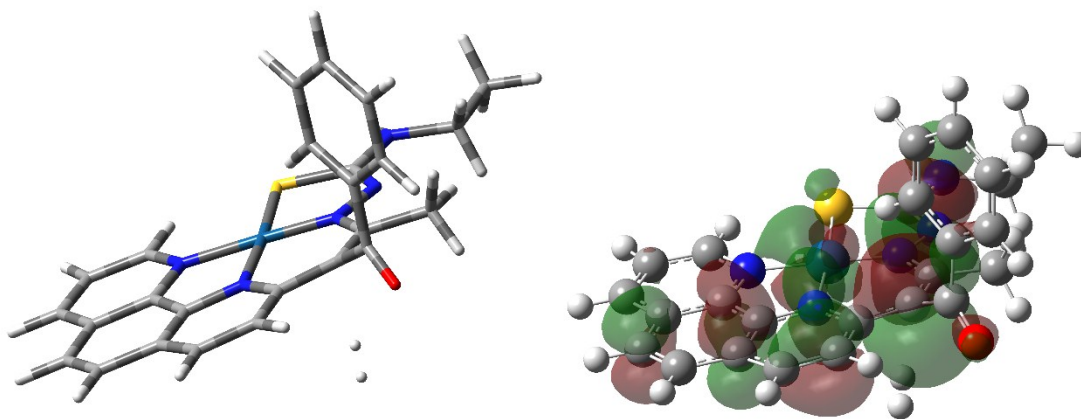

**Figure S2.** Structure (left) and HOMO (right) of  $\text{TS}^{\text{Et}}$ . The HOMO diagram (right picture) shows a nodal plane between the hydrogen molecule and the complex molecule.

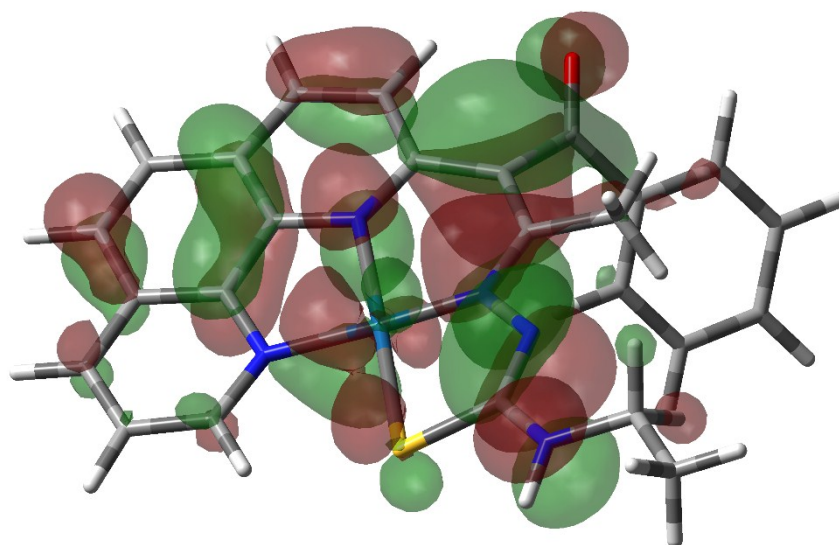

**Figure S3.** HOMO of the complex **1** showing a high distribution of  $\pi$  electron density.

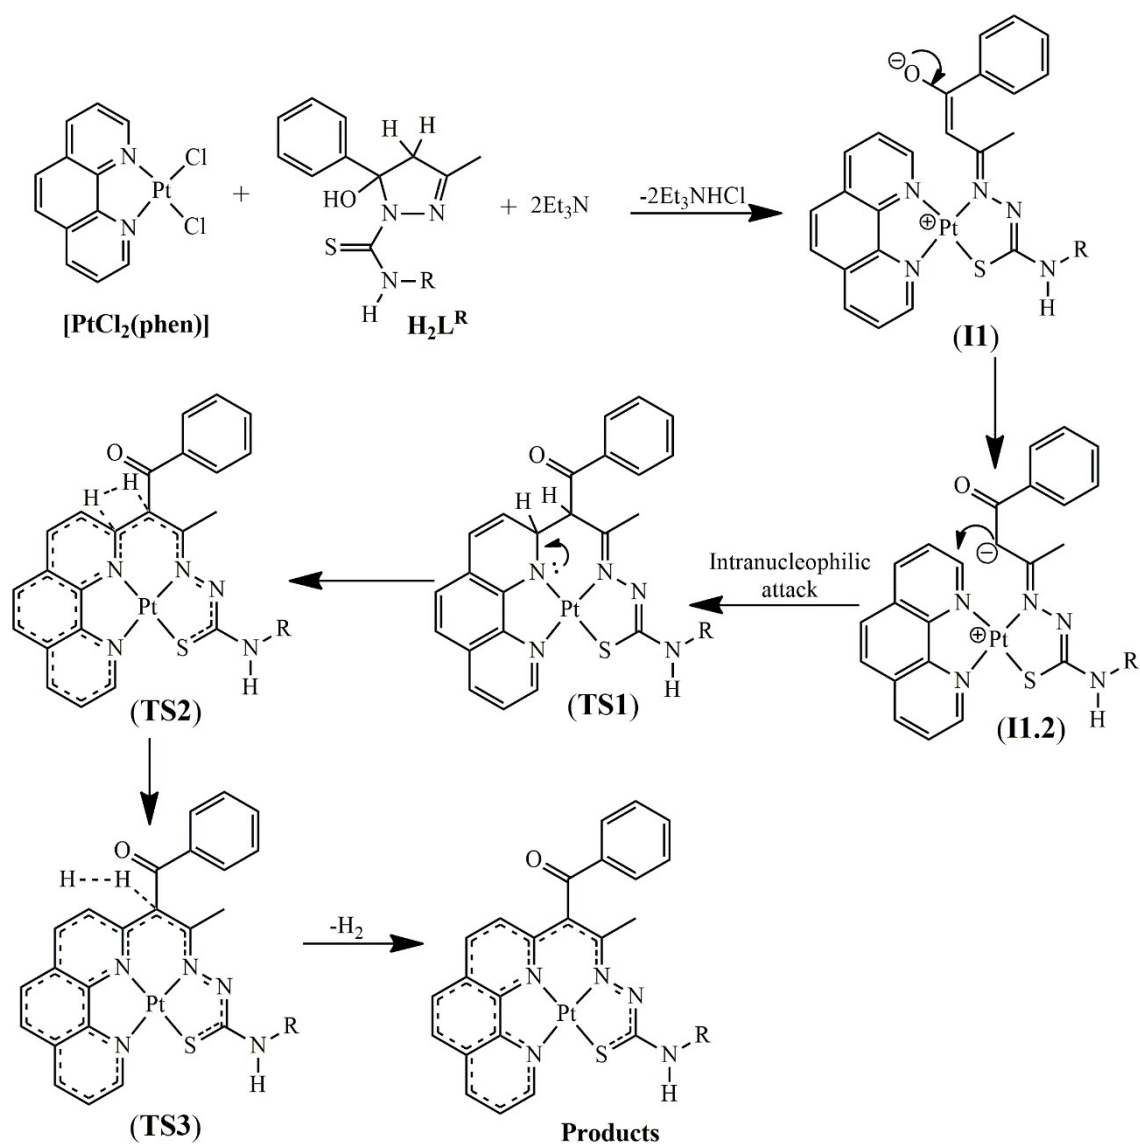

**Scheme S1.** Proposed reaction pathway for the formation of the  $[\text{Pt}(\text{phenL}^{\text{R}})]$  complexes.

### FTIR DATA

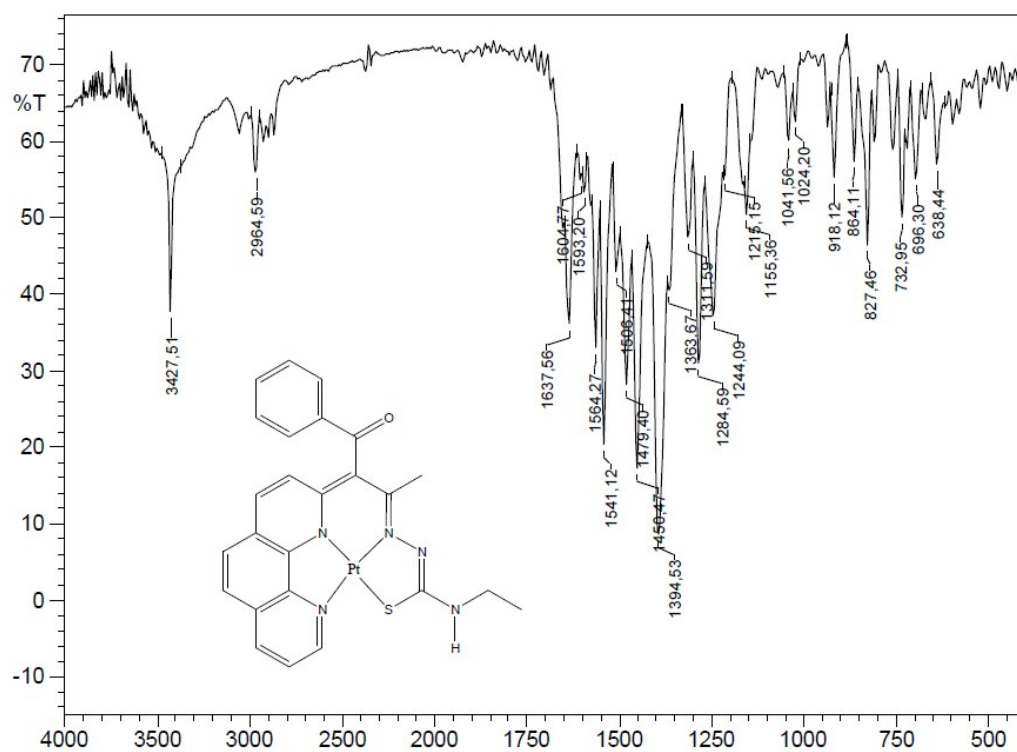

**Figure S4.** FTIR spectrum of the complex **1** from KBr pellets (cm<sup>-1</sup>).

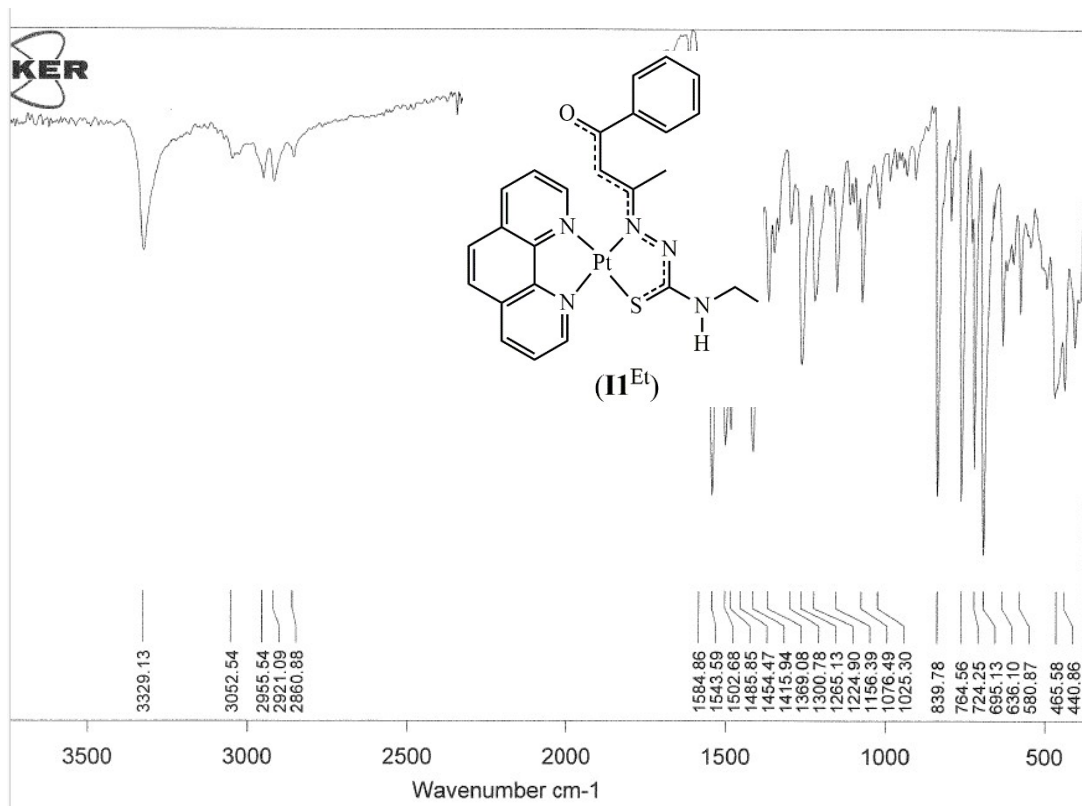

**Figure S5.** FTIR spectrum of the intermediate  $\text{II}^{\text{Et}}$ .

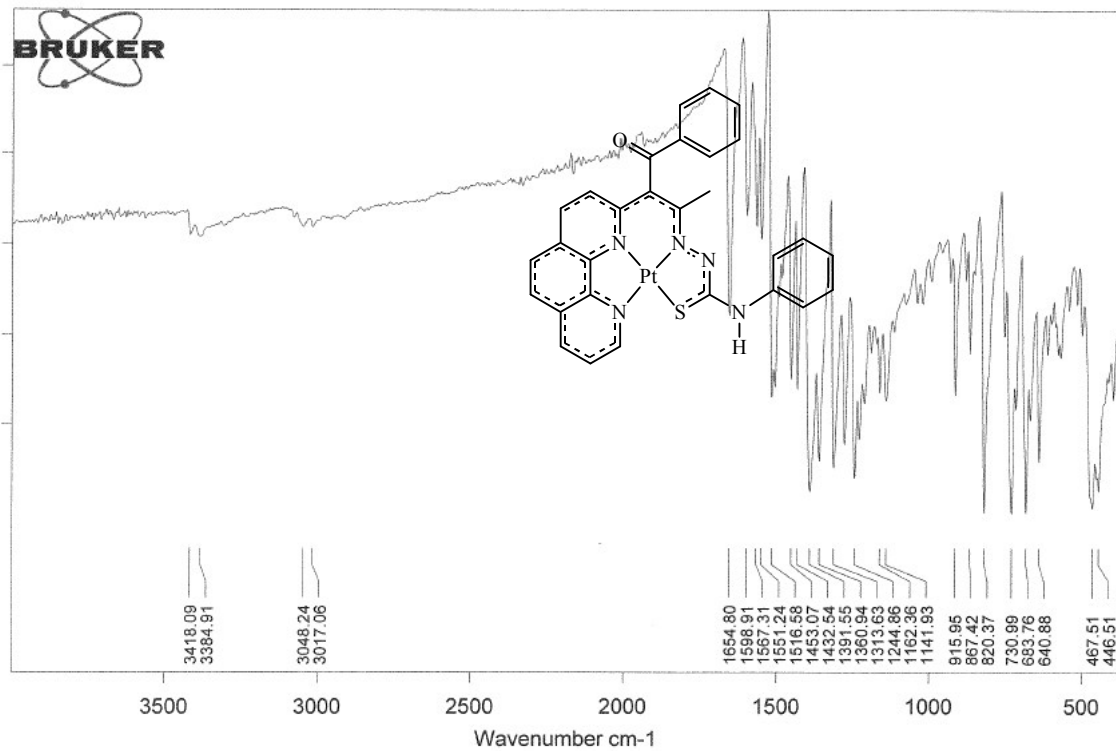

**Figure S6.** FTIR spectrum of the complex **2**.

### NMR DATA

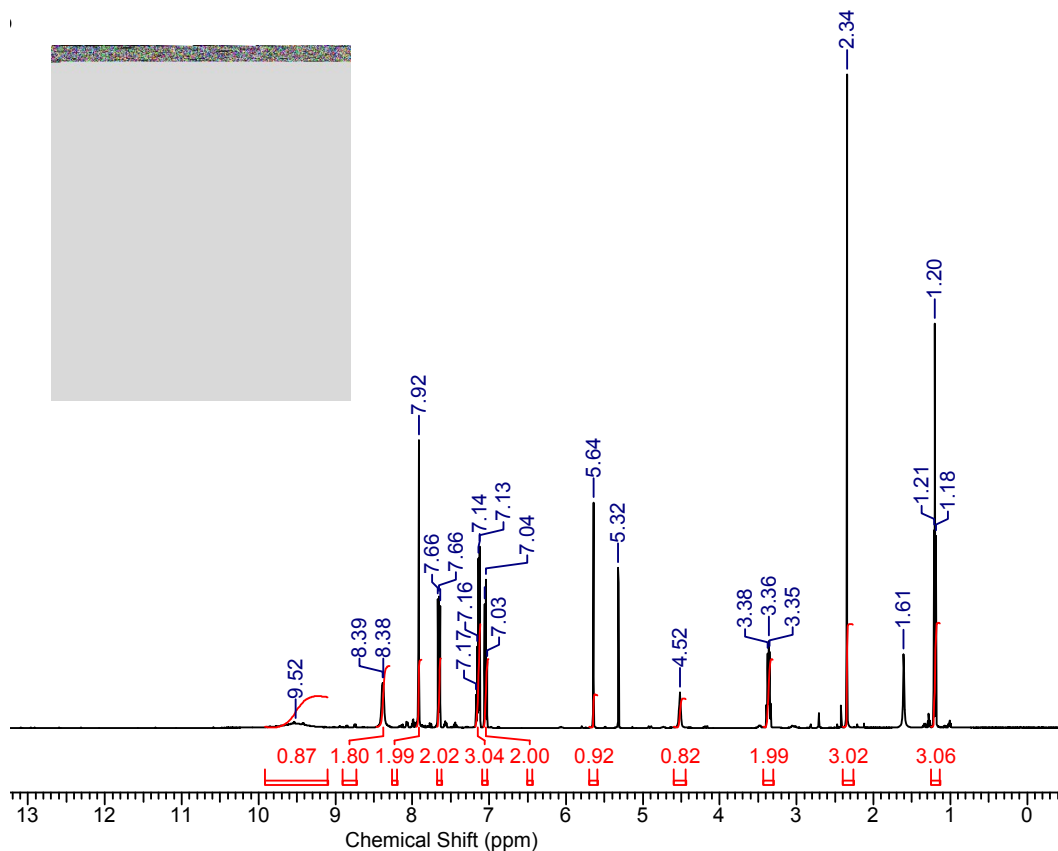

**Figure S7.**  $^1\text{H}$  NMR spectrum from a fresh  $\text{CD}_2\text{Cl}_2$  solution of the intermediate  $\text{I1}^{\text{Et}}$ .

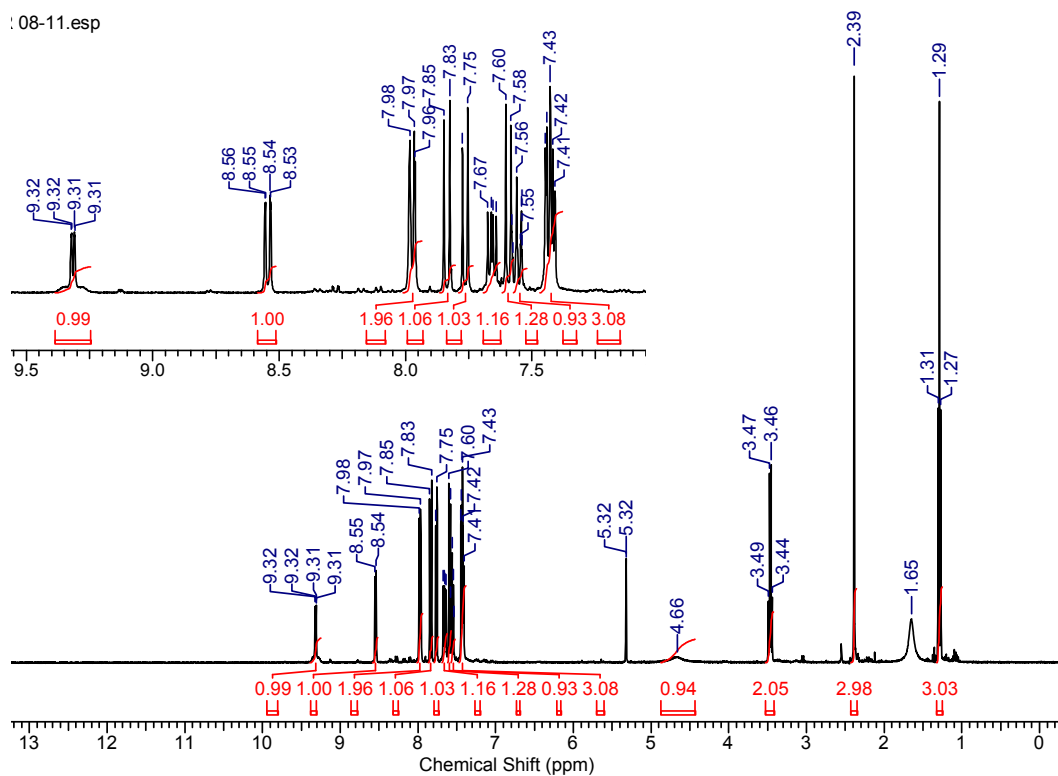

**Figure S8.**  $^1\text{H}$  NMR spectrum of the intermediate  $\text{I1}^{\text{Et}}$  after 4 days in  $\text{CD}_2\text{Cl}_2$  solution.

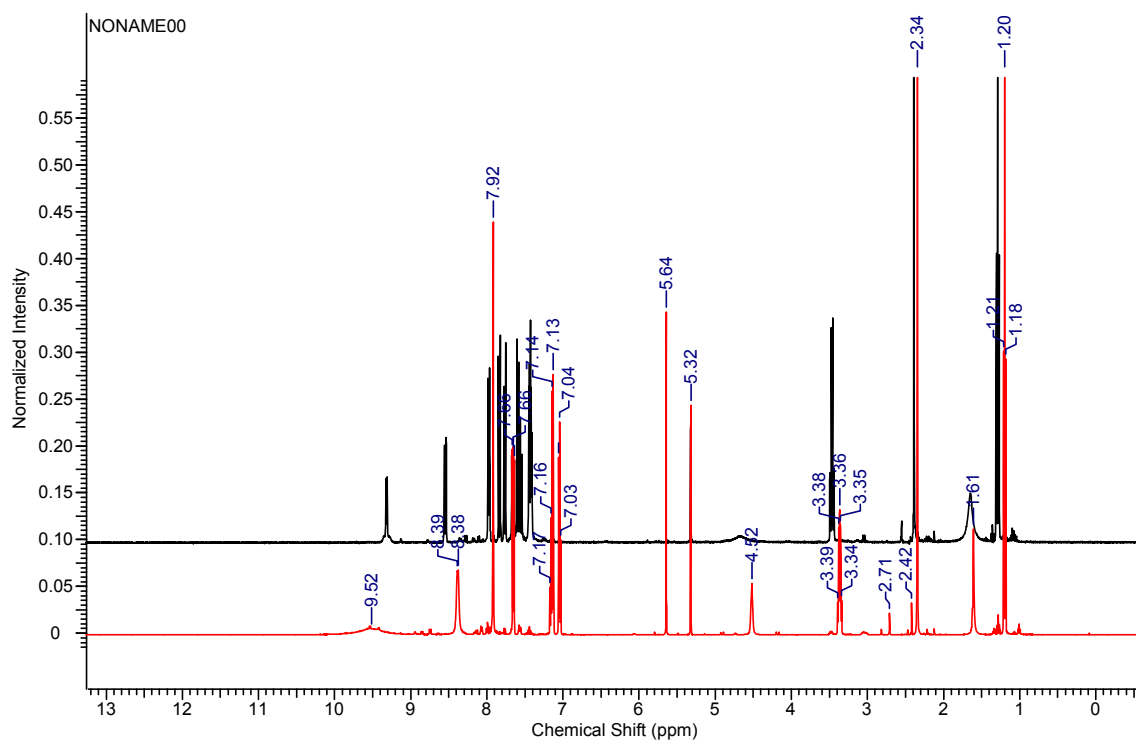

**Figure S9.** Superposition of the  $^1\text{H}$  NMR spectra of the intermediate  $\mathbf{11}^{\text{Et}}$ : from a fresh  $\text{CD}_2\text{Cl}_2$  solution (red line) and after 4 days in  $\text{CD}_2\text{Cl}_2$  solution (black line).

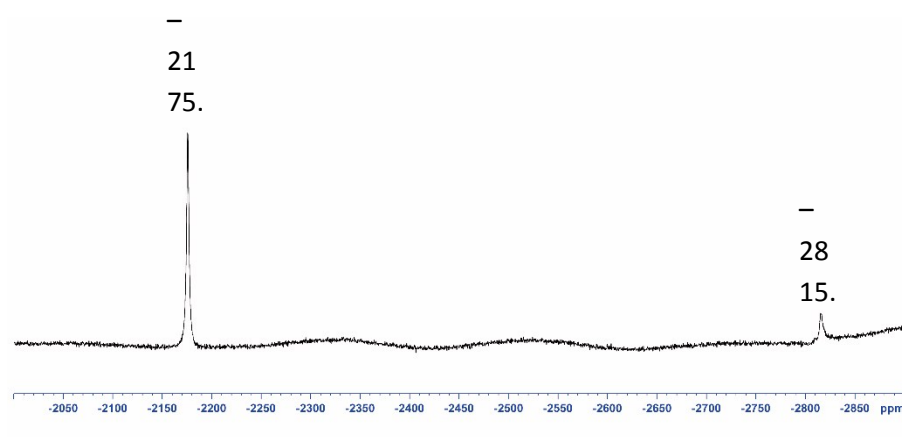

**Figure S10.**  $^{195}\text{Pt}$  NMR spectrum of the intermediate  $11^{\text{Et}}$  from a fresh  $\text{CD}_2\text{Cl}_2$  solution.

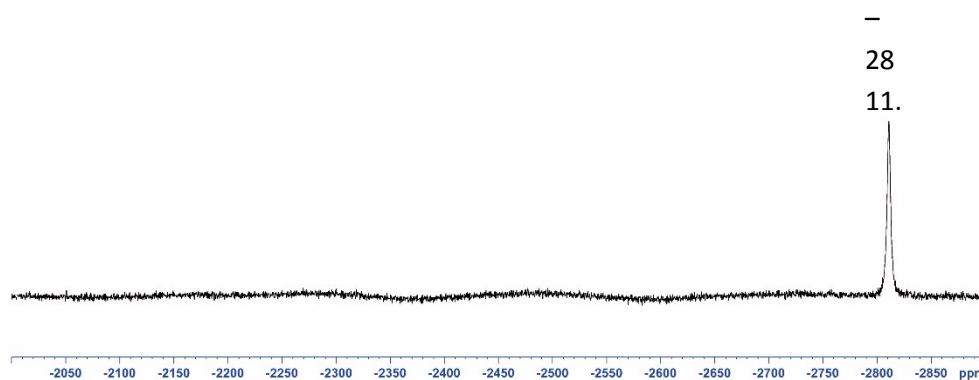

**Figure S11.**  $^{195}\text{Pt}$  NMR spectrum of the intermediate  $11^{\text{Et}}$  after two weeks in  $\text{CD}_2\text{Cl}_2$  solution.

eeeks.esp

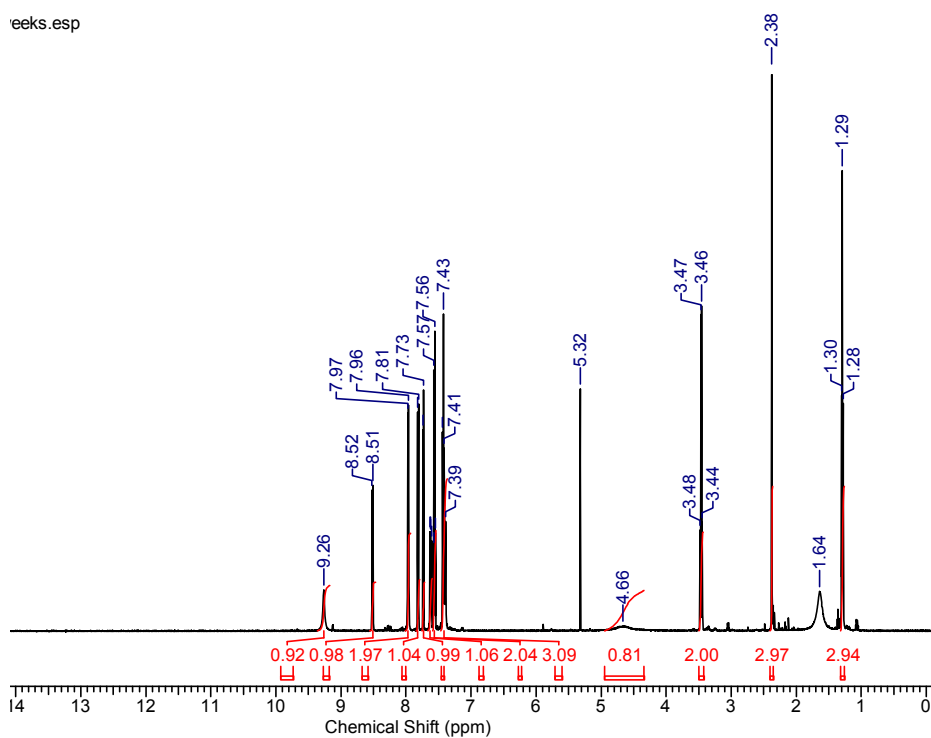

**Figure S12.**  $^1\text{H}$  NMR spectrum of the intermediate  $11^{\text{Et}}$  after two weeks in  $\text{CD}_2\text{Cl}_2$  solution.

#### HRMS DATA



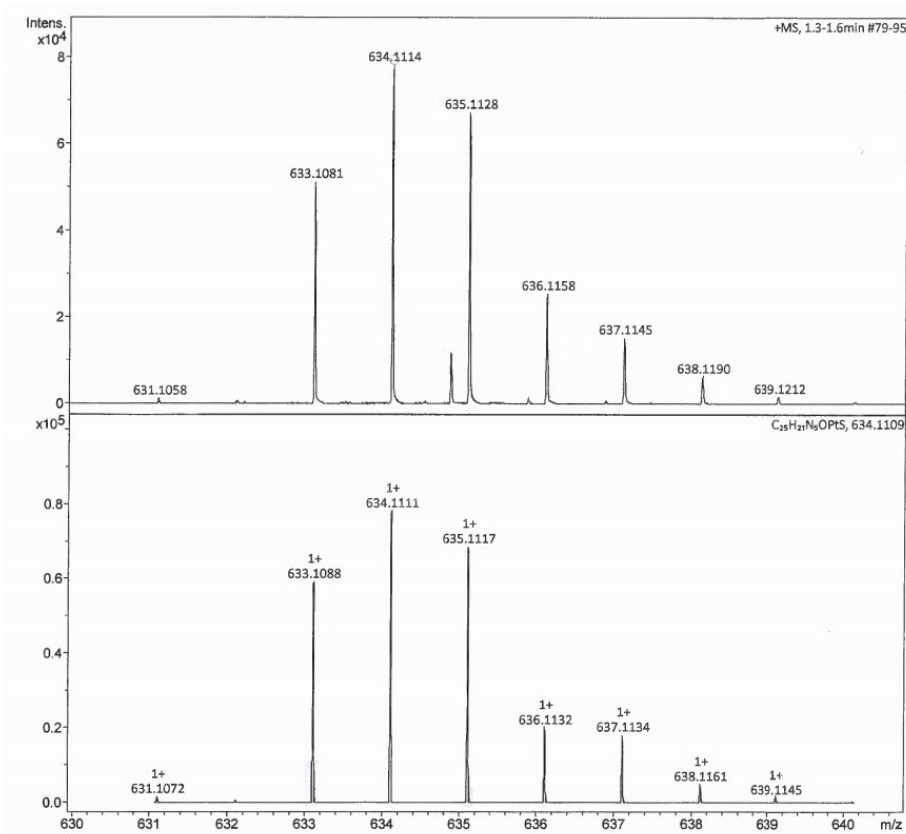

**Figure S13.** ESI(+)-MS spectrum of the complex **1** from a 9:1 MeOH/MeCN solution.

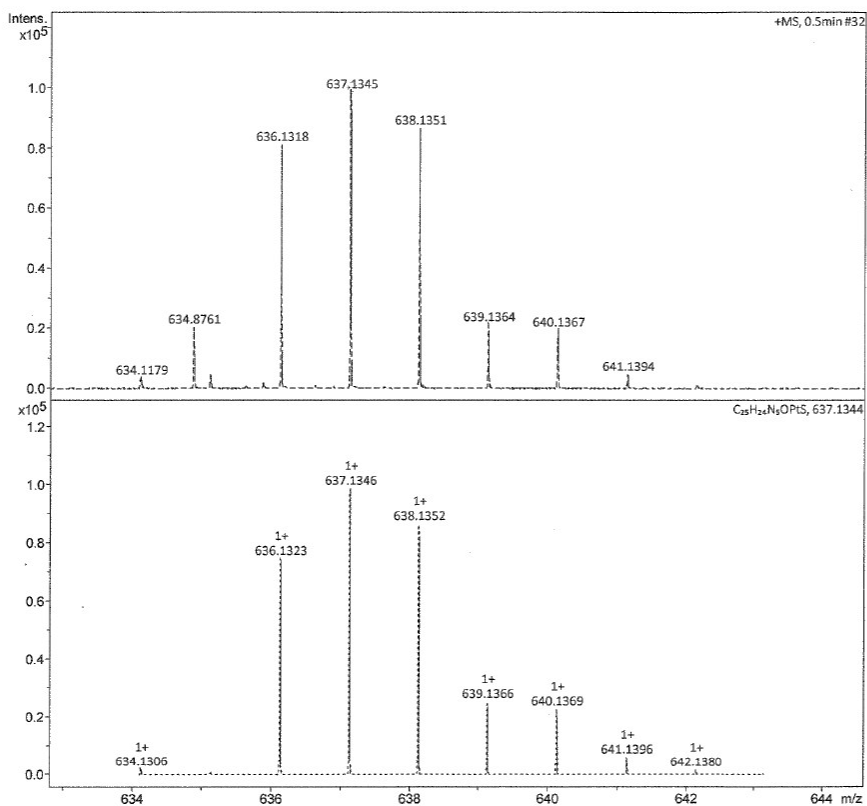

**Figure S14.** ESI(+)-MS spectrum of the intermediate **11<sup>Et</sup>** from a 9:1 MeOH/MeCN solution.

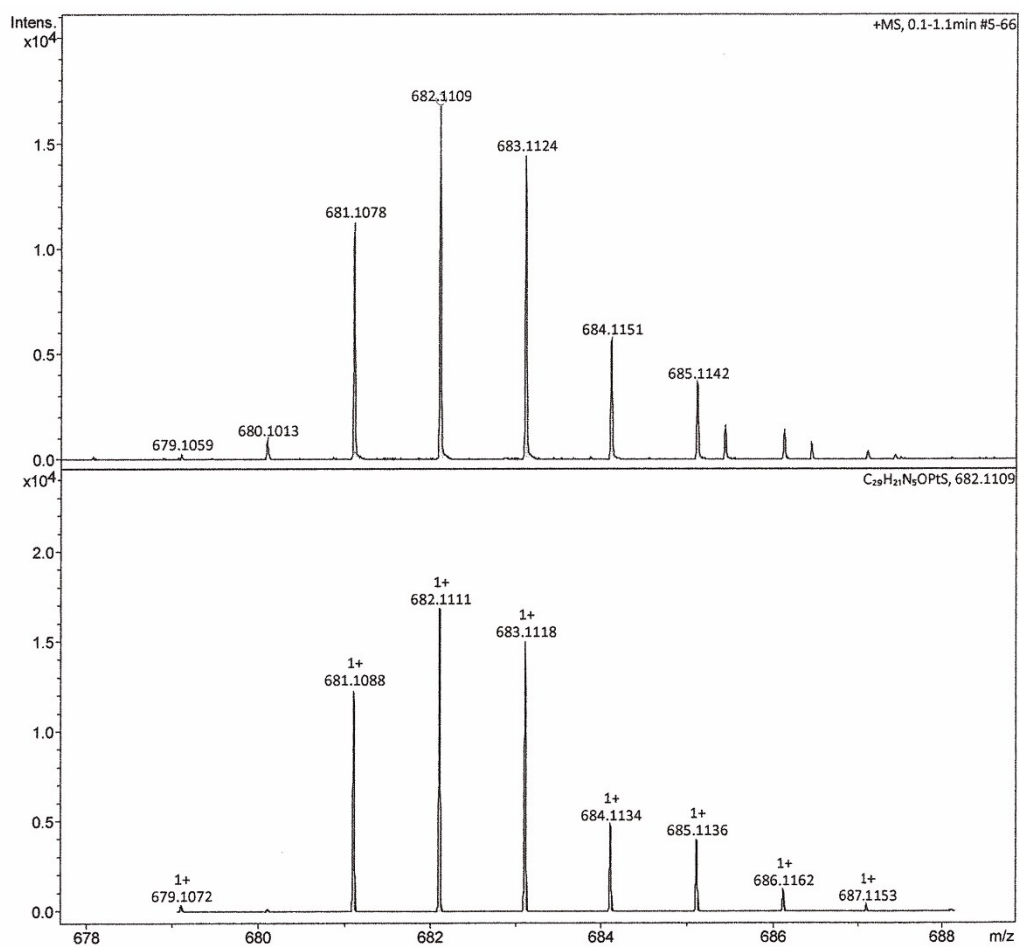

**Figure S15.** ESI(+)-MS spectrum of the complex **2** from a 9:1 MeOH/MeCN solution.

## HPLC DATA

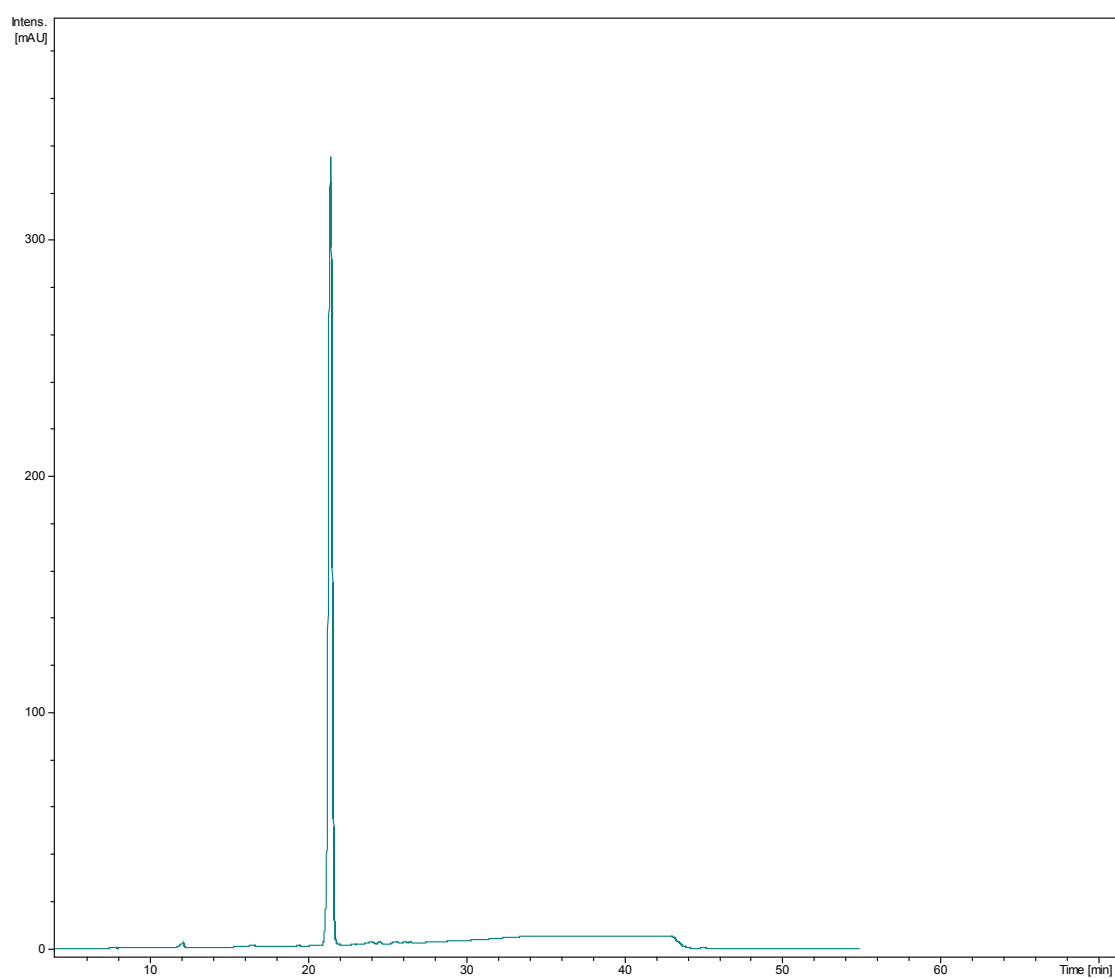

Retention time: 21.5 min

**Figure S16.** HPLC of the intermediate **I1<sup>Et</sup>** from Acetone/MeOH (1:9) solution.

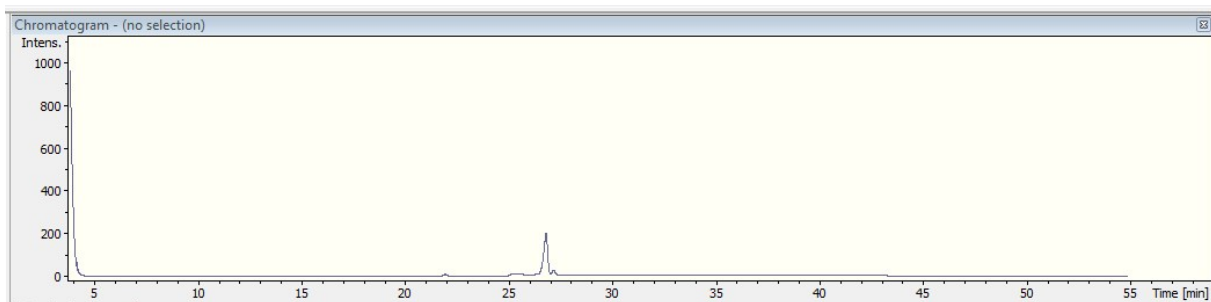

Retention time: 26.8 min

**Figure S17.** HPLC of the complex **1** from Acetone/MeOH (1:9) solution.

## UV-vis DATA

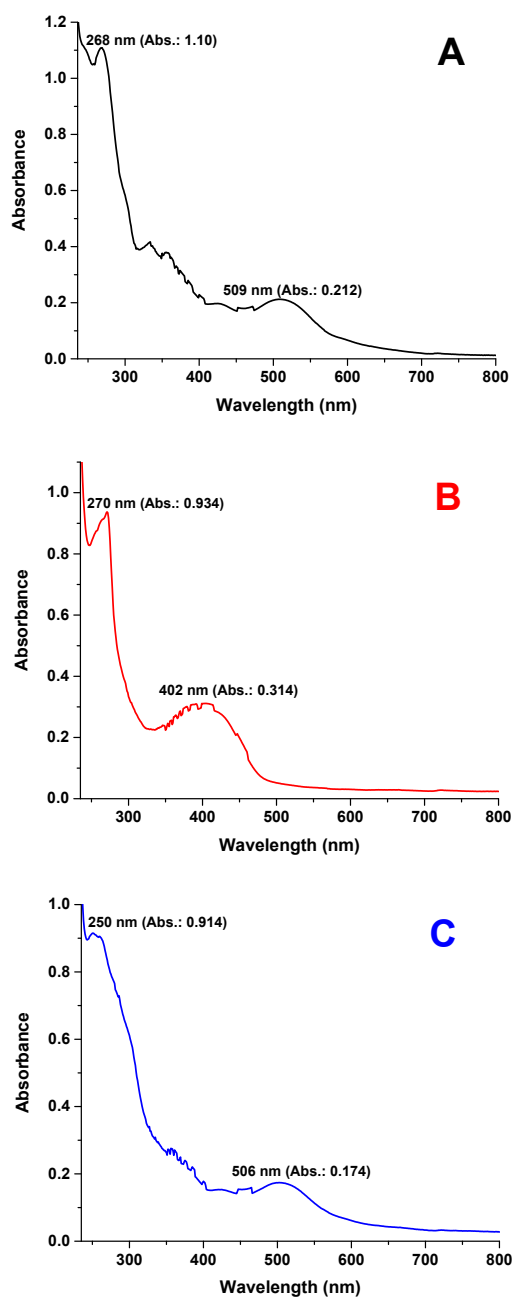

**Figure S18.** UV-Vis spectra of (A) [Pt(phenL<sup>Et</sup>)] (20  $\mu$ M), (B) Intermediate **I**<sup>Et</sup> (40  $\mu$ M) and (C) [Pt(phenL<sup>Ph</sup>)] (30  $\mu$ M) in dichloromethane.

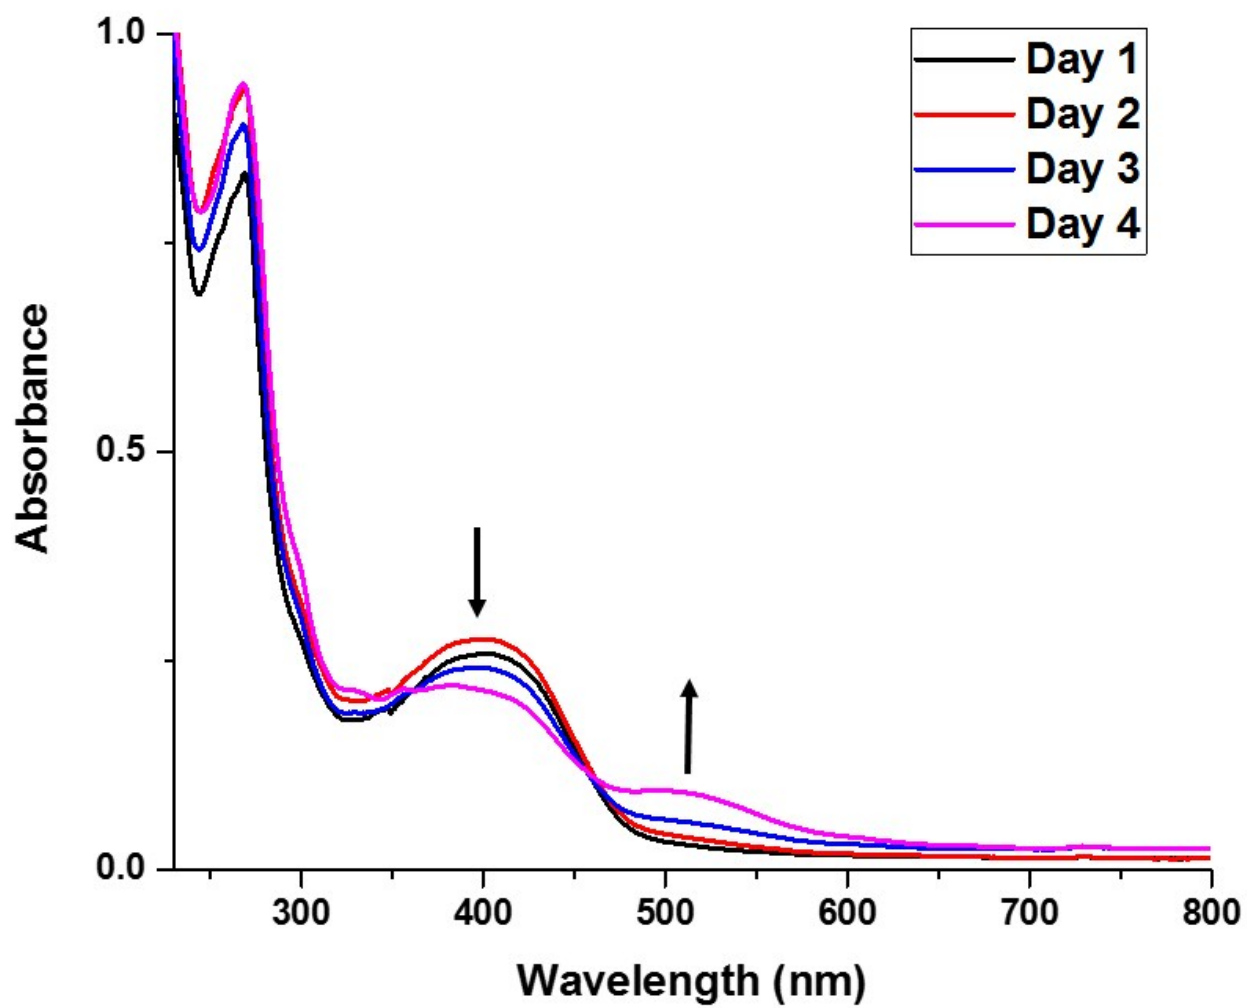

**Figure S19.** UV-Vis spectra of Intermediate **II<sup>Et</sup>** from acetonitrile solution (20 μM) monitored during four days.

## Supplementary References

1. Rettondin, A. R.; Carneiro, Z. A.; Gonçalves, A. C. R.; Ferreira, V. F.; Oliveira, C. G.; Lima, A. N.; Oliveira, R. J.; Albuquerque, S.; Deflon, V. M.; Maia, P. I. S. *Eur. J. Med. Chem.* **2016**, *120*, 217.
2. Egan, T. J.; Koch, K. R.; Swan, P. L.; Clarkson, C.; Van Schalkwyk, D. A.; Smith, P. *J. J. Med. Chem.* **2004**, *47*, 2926.
3. Sheldrick, G. M. *SHELXS-97 and SHELXL2014, Programs for the solution and refinement of crystal structures*; University of Göttingen: Göttingen, Germany, 1997 and 2014.
4. Pritchard, B. P.; Altarawy, D.; Didier, B.; Gibson, T. D.; Windus, T. L. *J. Chem. Inf. Model.* **2019**, *59(11)*, 4814.
5. Barbieri, P. L.; Fantin, P. A.; Jorge, F. E. *Mol. Phys.* **2006**, *104*, 2945.
6. Martins, L. S. C.; Jorge, F. E.; Machado, S. F. *Mol. Phys.* **2015**, *113*, 3578.
7. Tomasi, J.; Mennucci, B.; Cancès, E. *J. Mol. Struct. (Theochem)* **1999**, *464*, 211.
8. Peng, C.; Schlegel, H. B. *Israel J. of Chem.* **1993**, *33*, 449.
9. Peng, C.; Ayala, P. Y.; Schlegel, H. B.; Frisch, M. J. *J. Comp. Chem.* **1996**, *17*, 49.
10. Frisch, M. J.; Trucks, G. W.; Schlegel, H. B.; Scuseria, G. E.; Robb, M. A.; Cheeseman, J. R.; Scalmani, G.; Barone, V.; Mennucci, B.; Petersson, G. A.; Nakatsuji, H.; Caricato, M.; Li, X.; Hratchian, H. P.; Izmaylov, A. F.; Bloino, J.; Zheng, G.; Sonnenberg, J. L.; Hada, M.; Ehara, M.; Toyota, K.; Fukuda, R.; Hasegawa, J.; Ishida, M.; Nakajima, T.; Honda, Y.; Kitao, O.; Nakai, H.; Vreven, T.; Montgomery Jr., J. A.; Peralta, J. E.; Ogliaro, F.; Bearpark, M.; Heyd, J. J.; Brothers, E.; Kudin, K. N.; Staroverov, V. N.; Keith, T.; Kobayashi, R.; Normand, J.; Raghavachari, K.; Rendell, A.; Burant, J. C.; Iyengar, S. S.; Tomasi, J.; Cossi, M.; Rega, N.; Millam, J. M.; Klene, M.; Knox, J. E.; Cross, J. B.; Bakken, V.; Adamo, C.; Jaramillo, J.; Gomperts, R.; Stratmann, R. E.; Yazyev, O.; Austin, A. J.; Cammi, R.; Pomelli, C.; Ochterski, J. W.; Martin, R. L.; Morokuma, K.; Zakrzewski, V. G.; Voth, G. A.; Salvador, P.; Dannenberg, J. J.; Dapprich, S.; Daniels, A. D.; Farkas, O.; Foresman, J. B.; Ortiz, J. V.; Cioslowski, J.; Fox, D. J. *Gaussian 09, Revision E.01*, Gaussian, Inc., Wallingford CT, 2015.

## Optimized parameters for the TS, Reagents and Products.

"Optimization completed.

-- Stationary point found.

-----  
! Optimized Parameters !

! (Angstroms and Degrees) !

```
-----
! Name Definition      TS   Reactant Product Derivative Info.  !
-----
! R1 R(1,3)           1.0843  1.0943  1.0931 -DE/DX = 0.0  !
! R2 R(2,4)           1.0842  1.0946  1.0936 -DE/DX = 0.0  !
! R3 R(3,4)           1.387   1.423   1.4235 -DE/DX = 0.0  !
! R4 R(3,7)           1.3828  1.4194  1.4197 -DE/DX = 0.0  !
! R5 R(4,13)          1.3881  1.4237  1.4255 -DE/DX = 0.0  !
! R6 R(5,7)           1.0854  1.0948  1.0946 -DE/DX = 0.0  !
! R7 R(6,20)          1.0926  1.1049  1.1042 -DE/DX = 0.0  !
! R8 R(7,32)          1.3972  1.4257  1.4269 -DE/DX = 0.0  !
! R9 R(8,10)          1.0816  1.0909  1.0899 -DE/DX = 0.0  !
! R10 R(9,12)         1.0841  1.0939  1.0931 -DE/DX = 0.0  !
! R11 R(10,12)        1.3656  1.4114  1.4082 -DE/DX = 0.0  !
! R12 R(10,16)        1.387   1.4239  1.4279 -DE/DX = 0.0  !
! R13 R(11,28)        1.0954  1.1067  1.1061 -DE/DX = 0.0  !
! R14 R(12,19)        1.3962  1.4315  1.435   -DE/DX = 0.0  !
! R15 R(13,18)        1.0844  1.0942  1.0931 -DE/DX = 0.0  !
! R16 R(13,37)        1.3821  1.419   1.4178 -DE/DX = 0.0  !
! R17 R(14,16)        1.0807  1.0921  1.0917 -DE/DX = 0.0  !
! R18 R(15,23)        1.0077  1.0165  1.0186 -DE/DX = 0.0  !
! R19 R(16,24)        1.326   1.3631  1.3559 -DE/DX = 0.0  !
! R20 R(17,21)        1.0841  1.0942  1.0931 -DE/DX = 0.0  !
```

|      |          |        |        |        |              |   |
|------|----------|--------|--------|--------|--------------|---|
| !R21 | R(19,21) | 1.4196 | 1.4587 | 1.453  | -DE/DX = 0.0 | ! |
| !R22 | R(19,26) | 1.4117 | 1.4348 | 1.4357 | -DE/DX = 0.0 | ! |
| !R23 | R(20,25) | 1.0905 | 1.1022 | 1.1016 | -DE/DX = 0.0 | ! |
| !R24 | R(20,28) | 1.5067 | 1.5421 | 1.5415 | -DE/DX = 0.0 | ! |
| !R25 | R(20,34) | 1.0936 | 1.1055 | 1.1045 | -DE/DX = 0.0 | ! |
| !R26 | R(21,31) | 1.3562 | 1.3907 | 1.3963 | -DE/DX = 0.0 | ! |
| !R27 | R(22,29) | 1.7419 | 1.8424 | 1.8356 | -DE/DX = 0.0 | ! |
| !R28 | R(22,33) | 2.4108 | 3.2766 | 2.3868 | -DE/DX = 0.0 | ! |
| !R29 | R(23,28) | 1.4453 | 1.4727 | 1.4775 | -DE/DX = 0.0 | ! |
| !R30 | R(23,29) | 1.3598 | 1.3836 | 1.3765 | -DE/DX = 0.0 | ! |
| !R31 | R(24,26) | 1.3719 | 1.3918 | 1.3931 | -DE/DX = 0.0 | ! |
| !R32 | R(24,33) | 1.8573 | 2.0617 | 2.0634 | -DE/DX = 0.0 | ! |
| !R33 | R(26,35) | 1.4079 | 1.4389 | 1.4385 | -DE/DX = 0.0 | ! |
| !R34 | R(27,43) | 1.0862 | 1.1037 | 1.1031 | -DE/DX = 0.0 | ! |
| !R35 | R(28,44) | 1.0998 | 1.1075 | 1.1068 | -DE/DX = 0.0 | ! |
| !R36 | R(29,52) | 1.2841 | 1.3181 | 1.3298 | -DE/DX = 0.0 | ! |
| !R37 | R(30,31) | 1.0854 | 1.0943 | 1.0937 | -DE/DX = 0.0 | ! |
| !R38 | R(31,36) | 1.414  | 1.4576 | 1.4519 | -DE/DX = 0.0 | ! |
| !R39 | R(32,37) | 1.3903 | 1.4255 | 1.4274 | -DE/DX = 0.0 | ! |
| !R40 | R(32,48) | 1.4934 | 1.5143 | 1.5079 | -DE/DX = 0.0 | ! |
| !R41 | R(33,38) | 2.0327 | 2.0535 | 2.0375 | -DE/DX = 0.0 | ! |
| !R42 | R(33,53) | 1.6673 | 3.9743 | 2.0119 | -DE/DX = 0.0 | ! |
| !R43 | R(35,36) | 1.3894 | 1.4344 | 1.4229 | -DE/DX = 0.0 | ! |
| !R44 | R(35,38) | 1.3371 | 1.3902 | 1.3935 | -DE/DX = 0.0 | ! |
| !R45 | R(36,40) | 1.4193 | 1.4323 | 1.4458 | -DE/DX = 0.0 | ! |
| !R46 | R(37,49) | 1.0846 | 1.094  | 1.0937 | -DE/DX = 0.0 | ! |
| !R47 | R(38,55) | 1.324  | 1.356  | 1.3834 | -DE/DX = 0.0 | ! |
| !R48 | R(39,40) | 1.0853 | 1.0938 | 1.0932 | -DE/DX = 0.0 | ! |
| !R49 | R(40,42) | 1.3594 | 1.4071 | 1.3909 | -DE/DX = 0.0 | ! |
| !R50 | R(41,43) | 1.4957 | 1.5265 | 1.5298 | -DE/DX = 0.0 | ! |



|      |             |          |          |          |              |   |
|------|-------------|----------|----------|----------|--------------|---|
| !R51 | R(41,45)    | 1.4062   | 1.4114   | 1.4491   | -DE/DX = 0.0 | ! |
| !R52 | R(41,53)    | 1.3285   | 1.3896   | 1.3622   | -DE/DX = 0.0 | ! |
| !R53 | R(41,54)    | 2.4921   | 2.1372   | 3.7197   | -DE/DX = 0.0 | ! |
| !R54 | R(42,46)    | 1.0828   | 1.0897   | 1.0889   | -DE/DX = 0.0 | ! |
| !R55 | R(42,55)    | 1.4264   | 1.4278   | 1.4648   | -DE/DX = 0.0 | ! |
| !R56 | R(43,47)    | 1.0861   | 1.0996   | 1.0986   | -DE/DX = 0.0 | ! |
| !R57 | R(43,50)    | 1.0764   | 1.1012   | 1.1017   | -DE/DX = 0.0 | ! |
| !R58 | R(45,48)    | 1.4874   | 1.4659   | 1.5096   | -DE/DX = 0.0 | ! |
| !R59 | R(45,54)    | 2.4095   | 1.0968   | 3.66     | -DE/DX = 0.0 | ! |
| !R60 | R(45,55)    | 1.3956   | 4.4596   | 1.45     | -DE/DX = 0.0 | ! |
| !R61 | R(48,51)    | 1.2135   | 1.2873   | 1.2742   | -DE/DX = 0.0 | ! |
| !R62 | R(50,54)    | 3.9017   | 4.2341   | 3.6621   | -DE/DX = 0.0 | ! |
| !R63 | R(52,53)    | 1.3847   | 1.425    | 1.4236   | -DE/DX = 0.0 | ! |
| !R64 | R(54,56)    | 0.7499   | 3.082    | 0.93     | -DE/DX = 0.0 | ! |
| !R65 | R(55,56)    | 3.2122   | 1.0903   | 4.9371   | -DE/DX = 0.0 | ! |
| !A1  | A(1,3,4)    | 119.9631 | 120.0355 | 120.0272 | -DE/DX = 0.0 | ! |
| !A2  | A(1,3,7)    | 120.016  | 119.9457 | 119.9306 | -DE/DX = 0.0 | ! |
| !A3  | A(4,3,7)    | 120.0205 | 120.0178 | 120.0421 | -DE/DX = 0.0 | ! |
| !A4  | A(2,4,3)    | 119.9295 | 119.9709 | 119.9037 | -DE/DX = 0.0 | ! |
| !A5  | A(2,4,13)   | 119.7856 | 119.9688 | 119.8754 | -DE/DX = 0.0 | ! |
| !A6  | A(3,4,13)   | 120.2848 | 120.0576 | 120.2209 | -DE/DX = 0.0 | ! |
| !A7  | A(3,7,5)    | 121.8809 | 120.7939 | 120.2466 | -DE/DX = 0.0 | ! |
| !A8  | A(3,7,32)   | 119.8279 | 120.0542 | 119.7919 | -DE/DX = 0.0 | ! |
| !A9  | A(5,7,32)   | 118.286  | 119.1365 | 119.9424 | -DE/DX = 0.0 | ! |
| !A10 | A(8,10,12)  | 121.7887 | 121.1368 | 121.1943 | -DE/DX = 0.0 | ! |
| !A11 | A(8,10,16)  | 118.1837 | 118.7753 | 118.9726 | -DE/DX = 0.0 | ! |
| !A12 | A(12,10,16) | 120.0275 | 120.0878 | 119.833  | -DE/DX = 0.0 | ! |
| !A13 | A(9,12,10)  | 121.663  | 121.1045 | 120.9058 | -DE/DX = 0.0 | ! |
| !A14 | A(9,12,19)  | 120.4715 | 119.8167 | 119.5284 | -DE/DX = 0.0 | ! |
| !A15 | A(10,12,19) | 117.8653 | 119.0771 | 119.5658 | -DE/DX = 0.0 | ! |

|      |             |          |          |          |              |   |
|------|-------------|----------|----------|----------|--------------|---|
| !A16 | A(4,13,18)  | 119.9777 | 120.0305 | 120.0581 | -DE/DX = 0.0 | ! |
| !A17 | A(4,13,37)  | 119.9191 | 119.9305 | 119.8457 | -DE/DX = 0.0 | ! |
| !A18 | A(18,13,37) | 120.1032 | 120.037  | 120.0962 | -DE/DX = 0.0 | ! |
| !A19 | A(10,16,14) | 118.3255 | 121.4845 | 121.3179 | -DE/DX = 0.0 | ! |
| !A20 | A(10,16,24) | 125.5838 | 122.0482 | 121.7859 | -DE/DX = 0.0 | ! |
| !A21 | A(14,16,24) | 116.0901 | 116.4674 | 116.8962 | -DE/DX = 0.0 | ! |
| !A22 | A(12,19,21) | 122.2508 | 123.9954 | 124.16   | -DE/DX = 0.0 | ! |
| !A23 | A(12,19,26) | 117.9664 | 117.4057 | 117.0915 | -DE/DX = 0.0 | ! |
| !A24 | A(21,19,26) | 119.7811 | 118.5958 | 118.7484 | -DE/DX = 0.0 | ! |
| !A25 | A(6,20,25)  | 108.1642 | 108.1006 | 108.2221 | -DE/DX = 0.0 | ! |
| !A26 | A(6,20,28)  | 111.0324 | 110.7809 | 110.8128 | -DE/DX = 0.0 | ! |
| !A27 | A(6,20,34)  | 107.9741 | 108.4916 | 108.5051 | -DE/DX = 0.0 | ! |
| !A28 | A(25,20,28) | 110.7556 | 110.5933 | 110.222  | -DE/DX = 0.0 | ! |
| !A29 | A(25,20,34) | 107.7091 | 107.9155 | 108.1047 | -DE/DX = 0.0 | ! |
| !A30 | A(28,20,34) | 111.072  | 110.8555 | 110.8831 | -DE/DX = 0.0 | ! |
| !A31 | A(17,21,19) | 118.0249 | 118.3039 | 118.7331 | -DE/DX = 0.0 | ! |
| !A32 | A(17,21,31) | 120.4504 | 120.821  | 121.0863 | -DE/DX = 0.0 | ! |
| !A33 | A(19,21,31) | 121.5243 | 120.8718 | 120.1803 | -DE/DX = 0.0 | ! |
| !A34 | A(29,22,33) | 87.1496  | 126.0261 | 93.2962  | -DE/DX = 0.0 | ! |
| !A35 | A(15,23,28) | 117.7969 | 119.944  | 119.0918 | -DE/DX = 0.0 | ! |
| !A36 | A(15,23,29) | 116.3906 | 118.5847 | 118.5019 | -DE/DX = 0.0 | ! |
| !A37 | A(28,23,29) | 121.5703 | 121.342  | 122.3998 | -DE/DX = 0.0 | ! |
| !A38 | A(16,24,26) | 114.1315 | 118.2771 | 119.0359 | -DE/DX = 0.0 | ! |
| !A39 | A(16,24,33) | 133.3394 | 128.9758 | 128.7728 | -DE/DX = 0.0 | ! |
| !A40 | A(26,24,33) | 112.5244 | 112.74   | 112.1911 | -DE/DX = 0.0 | ! |
| !A41 | A(19,26,24) | 124.424  | 123.0924 | 122.6857 | -DE/DX = 0.0 | ! |
| !A42 | A(19,26,35) | 116.9315 | 120.4751 | 120.9278 | -DE/DX = 0.0 | ! |
| !A43 | A(24,26,35) | 118.6438 | 116.4096 | 116.3858 | -DE/DX = 0.0 | ! |
| !A44 | A(11,28,20) | 110.8791 | 111.2721 | 111.1658 | -DE/DX = 0.0 | ! |
| !A45 | A(11,28,23) | 108.4306 | 108.8351 | 108.9361 | -DE/DX = 0.0 | ! |

!A46 A(11,28,44) 105.8074 106.4224 106.7578 -DE/DX = 0.0 !  
 !A47 A(20,28,23) 110.341 109.4878 109.4608 -DE/DX = 0.0 !  
 !A48 A(20,28,44) 110.7228 111.2783 111.0593 -DE/DX = 0.0 !  
 !A49 A(23,28,44) 110.5487 109.4695 109.3976 -DE/DX = 0.0 !  
 !A50 A(22,29,23) 117.5049 116.3506 116.4702 -DE/DX = 0.0 !  
 !A51 A(22,29,52) 124.0403 123.1025 124.2861 -DE/DX = 0.0 !  
 !A52 A(23,29,52) 118.4484 120.5252 119.2426 -DE/DX = 0.0 !  
 !A53 A(21,31,30) 120.8344 120.6796 120.5756 -DE/DX = 0.0 !  
 !A54 A(21,31,36) 120.2843 121.0494 121.1504 -DE/DX = 0.0 !  
 !A55 A(30,31,36) 118.8799 118.2698 118.274 -DE/DX = 0.0 !  
 !A56 A(7,32,37) 119.8435 119.7717 120.0737 -DE/DX = 0.0 !  
 !A57 A(7,32,48) 119.7423 120.9216 120.7542 -DE/DX = 0.0 !  
 !A58 A(37,32,48) 120.3918 119.1562 119.1056 -DE/DX = 0.0 !  
 !A59 A(22,33,24) 91.1665 129.2582 98.6557 -DE/DX = 0.0 !  
 !A60 L(22,33,38,53,-1) 184.7047 148.8457 179.524 -DE/DX = 0.0 !  
 !A61 L(22,33,38,53,-2) 180.0828 180.4564 179.6618 -DE/DX = 0.0 !  
 !A62 A(22,33,53) 88.0816 46.4328 85.2319 -DE/DX = 0.0 !  
 !A63 A(24,33,38) 84.1287 81.2721 81.8252 -DE/DX = 0.0 !  
 !A64 L(24,33,53,38,-1) 180.7518 183.685 176.1174 -DE/DX = 0.0 !  
 !A65 L(24,33,53,38,-2) 178.0686 191.0561 179.1355 -DE/DX = 0.0 !  
 !A66 A(38,33,53) 96.6231 102.4129 94.2921 -DE/DX = 0.0 !  
 !A67 A(26,35,36) 123.2804 120.3293 119.537 -DE/DX = 0.0 !  
 !A68 A(26,35,38) 113.9971 116.5711 116.7928 -DE/DX = 0.0 !  
 !A69 A(36,35,38) 122.6944 123.0892 123.67 -DE/DX = 0.0 !  
 !A70 A(31,36,35) 118.1733 118.6244 119.4519 -DE/DX = 0.0 !  
 !A71 A(31,36,40) 126.1467 124.0468 124.5463 -DE/DX = 0.0 !  
 !A72 A(35,36,40) 115.6762 117.3282 115.9992 -DE/DX = 0.0 !  
 !A73 A(13,37,32) 120.1015 120.1412 120.019 -DE/DX = 0.0 !  
 !A74 A(13,37,49) 121.0743 121.5588 121.0949 -DE/DX = 0.0 !  
 !A75 A(32,37,49) 118.8236 118.2973 118.886 -DE/DX = 0.0 !

|       |             |          |          |          |              |   |
|-------|-------------|----------|----------|----------|--------------|---|
| !A76  | A(33,38,35) | 110.6817 | 112.9842 | 112.7896 | -DE/DX = 0.0 | ! |
| !A77  | A(33,38,55) | 126.4449 | 128.4743 | 126.062  | -DE/DX = 0.0 | ! |
| !A78  | A(35,38,55) | 122.8734 | 118.1549 | 121.1204 | -DE/DX = 0.0 | ! |
| !A79  | A(36,40,39) | 119.1774 | 119.753  | 119.6035 | -DE/DX = 0.0 | ! |
| !A80  | A(36,40,42) | 120.5745 | 119.1303 | 120.089  | -DE/DX = 0.0 | ! |
| !A81  | A(39,40,42) | 120.248  | 121.1163 | 120.3073 | -DE/DX = 0.0 | ! |
| !A82  | A(43,41,45) | 113.0375 | 124.8599 | 118.9585 | -DE/DX = 0.0 | ! |
| !A83  | A(43,41,53) | 119.2401 | 116.4649 | 116.0737 | -DE/DX = 0.0 | ! |
| !A84  | A(43,41,54) | 112.2373 | 152.2496 | 86.9734  | -DE/DX = 0.0 | ! |
| !A85  | A(45,41,53) | 127.7165 | 118.6181 | 124.88   | -DE/DX = 0.0 | ! |
| !A86  | A(53,41,54) | 90.4685  | 91.2605  | 104.0364 | -DE/DX = 0.0 | ! |
| !A87  | A(40,42,46) | 119.9398 | 121.6416 | 119.1063 | -DE/DX = 0.0 | ! |
| !A88  | A(40,42,55) | 120.5754 | 119.8171 | 122.2471 | -DE/DX = 0.0 | ! |
| !A89  | A(46,42,55) | 119.4833 | 118.4824 | 118.6393 | -DE/DX = 0.0 | ! |
| !A90  | A(27,43,41) | 111.0075 | 110.3488 | 111.3653 | -DE/DX = 0.0 | ! |
| !A91  | A(27,43,47) | 107.649  | 108.8035 | 109.1858 | -DE/DX = 0.0 | ! |
| !A92  | A(27,43,50) | 106.822  | 106.4339 | 106.4561 | -DE/DX = 0.0 | ! |
| !A93  | A(41,43,47) | 110.0236 | 110.9683 | 112.0957 | -DE/DX = 0.0 | ! |
| !A94  | A(41,43,50) | 114.0221 | 109.8285 | 108.9778 | -DE/DX = 0.0 | ! |
| !A95  | A(47,43,50) | 107.0312 | 110.3528 | 108.5645 | -DE/DX = 0.0 | ! |
| !A96  | A(41,45,48) | 116.9692 | 129.5804 | 115.6949 | -DE/DX = 0.0 | ! |
| !A97  | A(41,45,54) | 76.5817  | 116.3115 | 81.0     | -DE/DX = 0.0 | ! |
| !A98  | A(41,45,55) | 127.4195 | 104.2491 | 128.4213 | -DE/DX = 0.0 | ! |
| !A99  | A(48,45,54) | 131.7652 | 112.7202 | 95.1725  | -DE/DX = 0.0 | ! |
| !A100 | A(48,45,55) | 113.3593 | 102.5984 | 115.808  | -DE/DX = 0.0 | ! |
| !A101 | A(54,45,55) | 81.4534  | 43.9267  | 97.0506  | -DE/DX = 0.0 | ! |
| !A102 | A(32,48,45) | 113.2457 | 122.5478 | 118.4186 | -DE/DX = 0.0 | ! |
| !A103 | A(32,48,51) | 121.5096 | 118.3874 | 119.1986 | -DE/DX = 0.0 | ! |
| !A104 | A(45,48,51) | 125.0407 | 118.9699 | 122.2869 | -DE/DX = 0.0 | ! |
| !A105 | A(43,50,54) | 52.5019  | 46.0796  | 96.7638  | -DE/DX = 0.0 | ! |

! A106 A(29,52,53) 116.5017 114.647 115.7227 -DE/DX = 0.0 !  
 ! A107 A(33,53,41) 125.5029 127.6549 124.5836 -DE/DX = 0.0 !  
 ! A108 A(33,53,52) 124.0918 119.1699 121.3909 -DE/DX = 0.0 !  
 ! A109 A(41,53,52) 110.3818 113.1752 113.9555 -DE/DX = 0.0 !  
 ! A110 A(41,54,50) 30.665 10.1984 33.9591 -DE/DX = 0.0 !  
 ! A111 L(41,54,56,50,-1) 161.1997 101.7887 169.4507 -DE/DX = 0.0 !  
 ! A112 L(41,54,56,50,-2) 188.1518 219.0811 191.4438 -DE/DX = 0.0 !  
 ! A113 A(45,54,50) 59.0114 34.4301 53.9889 -DE/DX = 0.0 !  
 ! A114 L(45,54,56,50,-1) 189.5461 126.0203 189.4804 -DE/DX = 0.0 !  
 ! A115 L(45,54,56,50,-2) 162.1716 125.7355 175.911 -DE/DX = 0.0 !  
 ! A116 A(50,54,56) 130.5347 91.5902 135.4916 -DE/DX = 0.0 !  
 ! A117 A(38,55,42) 117.5748 122.3074 116.8619 -DE/DX = 0.0 !  
 ! A118 A(38,55,45) 116.0256 103.1988 121.5638 -DE/DX = 0.0 !  
 ! A119 A(38,55,56) 83.1777 116.3849 100.3748 -DE/DX = 0.0 !  
 ! A120 A(42,55,45) 126.3863 122.5093 121.548 -DE/DX = 0.0 !  
 ! A121 A(42,55,56) 113.1552 121.2641 104.4329 -DE/DX = 0.0 !  
 ! A122 A(54,56,55) 31.0753 119.9743 23.2264 -DE/DX = 0.0 !  
 ! D1 D(1,3,4,2) 0.0022 -0.7039 -0.4271 -DE/DX = 0.0 !  
 ! D2 D(1,3,4,13) 179.9257 178.688 179.4995 -DE/DX = 0.0 !  
 ! D3 D(7,3,4,2) 179.8019 179.6811 179.589 -DE/DX = 0.0 !  
 ! D4 D(7,3,4,13) -0.2746 -0.927 -0.4843 -DE/DX = 0.0 !  
 ! D5 D(1,3,7,5) 1.1308 -0.7704 -0.7229 -DE/DX = 0.0 !  
 ! D6 D(1,3,7,32) -179.7074 -179.3297 -179.1346 -DE/DX = 0.0 !  
 ! D7 D(4,3,7,5) -178.6688 178.845 179.261 -DE/DX = 0.0 !  
 ! D8 D(4,3,7,32) 0.4931 0.2857 0.8492 -DE/DX = 0.0 !  
 ! D9 D(2,4,13,18) -0.2637 0.0401 -0.3121 -DE/DX = 0.0 !  
 ! D10 D(2,4,13,37) 179.7187 179.5284 179.6454 -DE/DX = 0.0 !  
 ! D11 D(3,4,13,18) 179.8128 -179.3518 179.7613 -DE/DX = 0.0 !  
 ! D12 D(3,4,13,37) -0.2049 0.1364 -0.2813 -DE/DX = 0.0 !  
 ! D13 D(3,7,32,37) -0.2366 1.1387 -0.4553 -DE/DX = 0.0 !

!D14 D(3,7,32,48) 178.0528 176.6418 176.5539 -DE/DX = 0.0 !  
 !D15 D(5,7,32,37) 178.9551 -177.4444 -178.8719 -DE/DX = 0.0 !  
 !D16 D(5,7,32,48) -2.7555 -1.9413 -1.8627 -DE/DX = 0.0 !  
 !D17 D(8,10,12,9) 0.0258 -0.1162 -0.0603 -DE/DX = 0.0 !  
 !D18 D(8,10,12,19) -179.7832 179.4118 179.9133 -DE/DX = 0.0 !  
 !D19 D(16,10,12,9) 179.8946 179.9806 179.868 -DE/DX = 0.0 !  
 !D20 D(16,10,12,19) 0.0855 -0.4914 -0.1583 -DE/DX = 0.0 !  
 !D21 D(8,10,16,14) -0.1254 -0.4169 0.0201 -DE/DX = 0.0 !  
 !D22 D(8,10,16,24) -179.82 179.5704 -179.954 -DE/DX = 0.0 !  
 !D23 D(12,10,16,14) -179.9989 179.4886 -179.9098 -DE/DX = 0.0 !  
 !D24 D(12,10,16,24) 0.3065 -0.5241 0.1161 -DE/DX = 0.0 !  
 !D25 D(9,12,19,21) -0.5884 1.0144 -0.2888 -DE/DX = 0.0 !  
 !D26 D(9,12,19,26) 179.8846 -179.6415 179.8368 -DE/DX = 0.0 !  
 !D27 D(10,12,19,21) 179.223 -178.5198 179.7372 -DE/DX = 0.0 !  
 !D28 D(10,12,19,26) -0.304 0.8243 -0.1372 -DE/DX = 0.0 !  
 !D29 D(4,13,37,32) 0.4615 1.2945 0.6751 -DE/DX = 0.0 !  
 !D30 D(4,13,37,49) -179.8191 -178.0921 -179.4687 -DE/DX = 0.0 !  
 !D31 D(18,13,37,32) -179.5562 -179.2173 -179.3675 -DE/DX = 0.0 !  
 !D32 D(18,13,37,49) 0.1632 1.3961 0.4887 -DE/DX = 0.0 !  
 !D33 D(10,16,24,26) -0.4154 1.1357 0.2363 -DE/DX = 0.0 !  
 !D34 D(10,16,24,33) 178.714 -179.915 -179.9431 -DE/DX = 0.0 !  
 !D35 D(14,16,24,26) 179.8839 -178.8764 -179.7389 -DE/DX = 0.0 !  
 !D36 D(14,16,24,33) -0.9867 0.0728 0.0817 -DE/DX = 0.0 !  
 !D37 D(12,19,21,17) 0.7661 -1.7455 0.1363 -DE/DX = 0.0 !  
 !D38 D(12,19,21,31) -179.0041 177.5974 -179.6604 -DE/DX = 0.0 !  
 !D39 D(26,19,21,17) -179.7153 178.9177 -179.9913 -DE/DX = 0.0 !  
 !D40 D(26,19,21,31) 0.5145 -1.7394 0.2121 -DE/DX = 0.0 !  
 !D41 D(12,19,26,24) 0.1874 -0.2104 0.5046 -DE/DX = 0.0 !  
 !D42 D(12,19,26,35) 179.8632 -178.4084 -179.7999 -DE/DX = 0.0 !  
 !D43 D(21,19,26,24) -179.3517 179.1702 -179.3768 -DE/DX = 0.0 !

!D44 D(21,19,26,35) 0.3242 0.9723 0.3186 -DE/DX = 0.0 !  
 !D45 D(6,20,28,11) -60.4087 -60.3534 -59.745 -DE/DX = 0.0 !  
 !D46 D(6,20,28,23) 59.743 59.9963 60.6452 -DE/DX = 0.0 !  
 !D47 D(6,20,28,44) -177.5396 -178.8563 -178.4565 -DE/DX = 0.0 !  
 !D48 D(25,20,28,11) 59.7831 59.4864 60.0256 -DE/DX = 0.0 !  
 !D49 D(25,20,28,23) 179.9347 179.8361 -179.5842 -DE/DX = 0.0 !  
 !D50 D(25,20,28,44) -57.3479 -59.0165 -58.686 -DE/DX = 0.0 !  
 !D51 D(34,20,28,11) 179.4284 179.143 179.6948 -DE/DX = 0.0 !  
 !D52 D(34,20,28,23) -60.4199 -60.5074 -59.9151 -DE/DX = 0.0 !  
 !D53 D(34,20,28,44) 62.2974 60.6401 60.9832 -DE/DX = 0.0 !  
 !D54 D(17,21,31,30) -0.3574 0.1131 -0.1484 -DE/DX = 0.0 !  
 !D55 D(17,21,31,36) -179.9226 179.7147 179.8826 -DE/DX = 0.0 !  
 !D56 D(19,21,31,30) 179.4073 -179.2133 179.6434 -DE/DX = 0.0 !  
 !D57 D(19,21,31,36) -0.1579 0.3884 -0.3256 -DE/DX = 0.0 !  
 !D58 D(33,22,29,23) -178.8564 151.3349 179.8924 -DE/DX = 0.0 !  
 !D59 D(33,22,29,52) 0.2109 -30.3541 -0.4949 -DE/DX = 0.0 !  
 !D60 D(29,22,33,24) -176.4925 -169.6557 -177.7181 -DE/DX = 0.0 !  
 !D61 D(29,22,33,53) 1.5869 24.5506 1.4396 -DE/DX = 0.0 !  
 !D62 D(29,22,38,35) -175.1692 -171.9022 -178.848 -DE/DX = 0.0 !  
 !D63 D(29,22,38,55) 4.9789 6.2735 3.2735 -DE/DX = 0.0 !  
 !D64 D(15,23,28,11) 147.0965 128.2566 125.8564 -DE/DX = 0.0 !  
 !D65 D(15,23,28,20) 25.4824 6.4314 4.1153 -DE/DX = 0.0 !  
 !D66 D(15,23,28,44) -97.3368 -115.8041 -117.7861 -DE/DX = 0.0 !  
 !D67 D(29,23,28,11) -56.8821 -55.935 -55.0846 -DE/DX = 0.0 !  
 !D68 D(29,23,28,20) -178.4962 -177.7602 -176.8257 -DE/DX = 0.0 !  
 !D69 D(29,23,28,44) 58.6846 60.0043 61.2729 -DE/DX = 0.0 !  
 !D70 D(15,23,29,22) -15.8293 -8.9887 -1.4752 -DE/DX = 0.0 !  
 !D71 D(15,23,29,52) 165.0496 172.6538 178.8915 -DE/DX = 0.0 !  
 !D72 D(28,23,29,22) -172.1684 175.1475 179.4605 -DE/DX = 0.0 !  
 !D73 D(28,23,29,52) 8.7106 -3.21 -0.1728 -DE/DX = 0.0 !

!D74 D(16,24,26,19) 0.1631 -0.7681 -0.558 -DE/DX = 0.0 !  
!D75 D(16,24,26,35) -179.5076 177.4979 179.7337 -DE/DX = 0.0 !  
!D76 D(33,24,26,19) -179.1514 -179.8824 179.5931 -DE/DX = 0.0 !  
!D77 D(33,24,26,35) 1.1779 -1.6164 -0.1153 -DE/DX = 0.0 !  
!D78 D(16,24,33,22) -0.3979 8.821 1.1582 -DE/DX = 0.0 !  
!D79 D(16,24,33,38) 179.5264 -178.1181 -179.1754 -DE/DX = 0.0 !  
!D80 D(26,24,33,22) 178.742 -172.1823 -179.0112 -DE/DX = 0.0 !  
!D81 D(26,24,33,38) -1.3337 0.8785 0.6552 -DE/DX = 0.0 !  
!D82 D(16,24,53,41) 179.6342 142.9151 -177.5523 -DE/DX = 0.0 !  
!D83 D(16,24,53,52) -3.6797 -32.0095 -1.3753 -DE/DX = 0.0 !  
!D84 D(26,24,53,41) -2.4606 -29.4181 1.7232 -DE/DX = 0.0 !  
!D85 D(26,24,53,52) 174.2254 155.6573 177.9003 -DE/DX = 0.0 !  
!D86 D(19,26,35,36) -1.5851 1.1349 -0.7344 -DE/DX = 0.0 !  
!D87 D(19,26,35,38) -179.7039 179.9989 179.4466 -DE/DX = 0.0 !  
!D88 D(24,26,35,36) 178.1102 -177.1795 178.9795 -DE/DX = 0.0 !  
!D89 D(24,26,35,38) -0.0087 1.6845 -0.8395 -DE/DX = 0.0 !  
!D90 D(22,29,52,53) -2.5208 -1.5168 -1.3508 -DE/DX = 0.0 !  
!D91 D(23,29,52,53) 176.5384 176.7262 178.2519 -DE/DX = 0.0 !  
!D92 D(21,31,36,35) -1.0312 1.721 -0.0929 -DE/DX = 0.0 !  
!D93 D(21,31,36,40) 178.2239 -177.9697 179.2985 -DE/DX = 0.0 !  
!D94 D(30,31,36,35) 179.3952 -178.6679 179.9374 -DE/DX = 0.0 !  
!D95 D(30,31,36,40) -1.3496 1.6413 -0.6712 -DE/DX = 0.0 !  
!D96 D(7,32,37,13) -0.2418 -1.9311 -0.3089 -DE/DX = 0.0 !  
!D97 D(7,32,37,49) -179.9674 177.4754 179.8318 -DE/DX = 0.0 !  
!D98 D(48,32,37,13) -178.5199 -177.5138 -177.3672 -DE/DX = 0.0 !  
!D99 D(48,32,37,49) 1.7544 1.8926 2.7734 -DE/DX = 0.0 !  
!D100 D(7,32,48,45) 7.3802 30.4141 21.6707 -DE/DX = 0.0 !  
!D101 D(7,32,48,51) -167.6793 -146.0044 -154.8509 -DE/DX = 0.0 !  
!D102 D(37,32,48,45) -174.3399 -154.0555 -161.2915 -DE/DX = 0.0 !  
!D103 D(37,32,48,51) 10.6006 29.526 22.1869 -DE/DX = 0.0 !



!D104 D(24,33,38,35) 1.3571 -0.0008 -1.0924 -DE/DX = 0.0 !  
!D105 D(24,33,38,55) -178.6114 172.6392 -179.1743 -DE/DX = 0.0 !  
!D106 D(53,33,38,35) -176.7115 168.9431 179.772 -DE/DX = 0.0 !  
!D107 D(53,33,38,55) 3.32 -18.4169 1.6902 -DE/DX = 0.0 !  
!D108 D(22,33,53,41) 178.4078 151.9029 -179.4561 -DE/DX = 0.0 !  
!D109 D(22,33,53,52) -3.5254 -28.1118 -2.685 -DE/DX = 0.0 !  
!D110 D(38,33,53,41) -1.675 -28.5535 0.8821 -DE/DX = 0.0 !  
!D111 D(38,33,53,52) 176.3918 151.4318 177.6531 -DE/DX = 0.0 !  
!D112 D(26,35,36,31) 1.9499 -2.4675 0.617 -DE/DX = 0.0 !  
!D113 D(26,35,36,40) -177.3828 177.2441 -178.8252 -DE/DX = 0.0 !  
!D114 D(38,35,36,31) 179.9077 178.7452 -179.5771 -DE/DX = 0.0 !  
!D115 D(38,35,36,40) 0.5751 -1.5432 0.9806 -DE/DX = 0.0 !  
!D116 D(26,35,38,33) -1.0505 -0.8749 1.3666 -DE/DX = 0.0 !  
!D117 D(26,35,38,55) 178.9193 -174.3433 179.5554 -DE/DX = 0.0 !  
!D118 D(36,35,38,33) -179.1818 177.9548 -178.4442 -DE/DX = 0.0 !  
!D119 D(36,35,38,55) 0.788 4.4864 -0.2554 -DE/DX = 0.0 !  
!D120 D(31,36,40,39) 0.1724 -1.9589 -0.2165 -DE/DX = 0.0 !  
!D121 D(31,36,40,42) -179.9036 177.8116 179.9182 -DE/DX = 0.0 !  
!D122 D(35,36,40,39) 179.4439 178.3466 179.1939 -DE/DX = 0.0 !  
!D123 D(35,36,40,42) -0.6321 -1.8829 -0.6714 -DE/DX = 0.0 !  
!D124 D(33,38,55,42) 177.9875 -176.3341 177.1854 -DE/DX = 0.0 !  
!D125 D(33,38,55,45) -0.7746 40.399 -0.9763 -DE/DX = 0.0 !  
!D126 D(33,38,55,56) -69.4122 6.0426 -70.6812 -DE/DX = 0.0 !  
!D127 D(35,38,55,42) -1.9774 -4.0211 -0.7489 -DE/DX = 0.0 !  
!D128 D(35,38,55,45) 179.2605 -147.288 -178.9105 -DE/DX = 0.0 !  
!D129 D(35,38,55,56) 110.6229 178.3556 111.3846 -DE/DX = 0.0 !  
!D130 D(36,40,42,46) 179.8726 179.4968 -179.3172 -DE/DX = 0.0 !  
!D131 D(36,40,42,55) -0.5595 2.3331 -0.3092 -DE/DX = 0.0 !  
!D132 D(39,40,42,46) -0.2041 -0.7359 0.8183 -DE/DX = 0.0 !  
!D133 D(39,40,42,55) 179.3638 -177.8996 179.8264 -DE/DX = 0.0 !

! D134 D(45,41,43,27) -63.9636 -106.8663 -114.3002 -DE/DX = 0.0 !

! D135 D(45,41,43,47) 55.0892 13.8168 8.3611 -DE/DX = 0.0 !

! D136 D(45,41,43,50) 175.3358 136.1015 128.5576 -DE/DX = 0.0 !

! D137 D(53,41,43,27) 115.2221 75.9288 68.9407 -DE/DX = 0.0 !

! D138 D(53,41,43,47) -125.725 -163.388 -168.398 -DE/DX = 0.0 !

! D139 D(53,41,43,50) -5.4784 -41.1033 -48.2015 -DE/DX = 0.0 !

! D140 D(54,41,43,27) -140.9503 -106.6923 173.0944 -DE/DX = 0.0 !

! D141 D(54,41,43,47) -21.8975 13.9909 -64.2444 -DE/DX = 0.0 !

! D142 D(54,41,43,50) 98.3491 136.2756 55.9521 -DE/DX = 0.0 !

! D143 D(43,41,45,48) 23.8365 -14.7494 12.7562 -DE/DX = 0.0 !

! D144 D(43,41,45,54) -106.4741 179.8238 -78.6813 -DE/DX = 0.0 !

! D145 D(43,41,45,55) -174.4557 -134.8766 -170.572 -DE/DX = 0.0 !

! D146 D(53,41,45,48) -155.2653 162.4001 -170.7927 -DE/DX = 0.0 !

! D147 D(53,41,45,54) 74.4241 -3.0267 97.7698 -DE/DX = 0.0 !

! D148 D(53,41,45,55) 6.4425 42.2729 5.8791 -DE/DX = 0.0 !

! D149 D(43,41,53,33) 178.6035 161.1911 172.2192 -DE/DX = 0.0 !

! D150 D(43,41,53,52) 0.3113 -18.795 -4.7649 -DE/DX = 0.0 !

! D151 D(45,41,53,33) -2.3437 -16.1963 -4.3239 -DE/DX = 0.0 !

! D152 D(45,41,53,52) 179.3641 163.8177 178.692 -DE/DX = 0.0 !

! D153 D(54,41,53,33) 62.6081 -17.5885 78.6794 -DE/DX = 0.0 !

! D154 D(54,41,53,52) -115.6841 162.4254 -98.3047 -DE/DX = 0.0 !

! D155 D(43,41,54,50) -29.2628 -72.7598 -24.9598 -DE/DX = 0.0 !

! D156 D(53,41,54,50) 92.8158 104.8934 91.1739 -DE/DX = 0.0 !

! D157 D(40,42,55,38) 1.858 0.6863 1.0365 -DE/DX = 0.0 !

! D158 D(40,42,55,45) -179.5237 137.0177 179.1985 -DE/DX = 0.0 !

! D159 D(40,42,55,56) -92.592 178.1954 -108.7674 -DE/DX = 0.0 !

! D160 D(46,42,55,38) -178.5721 -176.5667 -179.951 -DE/DX = 0.0 !

! D161 D(46,42,55,45) 0.0461 -40.2352 -1.789 -DE/DX = 0.0 !

! D162 D(46,42,55,56) 86.9779 0.9424 70.2451 -DE/DX = 0.0 !

! D163 D(27,43,50,54) -170.5113 -132.4893 -178.0303 -DE/DX = 0.0 !

! D164 D(41,43,50,54) -47.5018 -13.0334 -57.8125 -DE/DX = 0.0 !  
! D165 D(47,43,50,54) 74.4088 109.616 64.5386 -DE/DX = 0.0 !  
! D166 D(41,45,48,32) 70.338 44.6227 58.7641 -DE/DX = 0.0 !  
! D167 D(41,45,48,51) -114.8071 -138.9788 -124.8278 -DE/DX = 0.0 !  
! D168 D(54,45,48,32) 166.3838 -149.5309 141.2509 -DE/DX = 0.0 !  
! D169 D(54,45,48,51) -18.7613 26.8676 -42.341 -DE/DX = 0.0 !  
! D170 D(55,45,48,32) -93.9068 165.4199 -118.3398 -DE/DX = 0.0 !  
! D171 D(55,45,48,51) 80.9481 -18.1817 58.0683 -DE/DX = 0.0 !  
! D172 D(48,45,54,50) -90.313 -150.4912 -92.364 -DE/DX = 0.0 !  
! D173 D(55,45,54,50) 155.8995 -65.8767 150.7856 -DE/DX = 0.0 !  
! D174 D(41,45,55,38) -4.2116 -78.4845 -2.8992 -DE/DX = 0.0 !  
! D175 D(41,45,55,42) 177.1514 138.3444 179.0252 -DE/DX = 0.0 !  
! D176 D(48,45,55,38) 158.0479 144.5988 173.7693 -DE/DX = 0.0 !  
! D177 D(48,45,55,42) -20.5891 1.4278 -4.3062 -DE/DX = 0.0 !  
! D178 D(54,45,55,38) -69.9785 34.8167 -86.9822 -DE/DX = 0.0 !  
! D179 D(54,45,55,42) 111.3845 -108.3543 94.9423 -DE/DX = 0.0 !  
! D180 D(43,50,54,41) 52.4173 58.8531 36.1012 -DE/DX = 0.0 !  
! D181 D(43,50,54,45) 26.437 -34.4925 20.5685 -DE/DX = 0.0 !  
! D182 D(43,50,54,56) -135.7346 -160.228 -155.3426 -DE/DX = 0.0 !  
! D183 D(29,52,53,33) 4.5503 24.7945 3.0254 -DE/DX = 0.0 !  
! D184 D(29,52,53,41) -177.1285 -155.2182 -179.8833 -DE/DX = 0.0 !  
! D185 D(38,55,56,54) 94.0931 66.8798 105.4349 -DE/DX = 0.0 !  
! D186 D(42,55,56,54) -148.7848 -110.7701 -133.1362 -DE/DX = 0.0 !

-----

Largest change from initial coordinates is atom 25 2.022 Angstroms.

GradGradGradGradGradGradGradGradGradGradGradGradGradGradGradGradGrad"
